# Supplementary material for: Effector XopQ-induced stromule formation in Nicotiana benthamiana depends on ETI signaling components ADR1 and NRG1
Source: PubMed Central journal article supplement — Plant Physiol. 2022 Oct 19;191(1):161–76. doi: 10.1093/plphys/kiac481 (PMC9806647; doi:10.1093/plphys/kiac481), 2022-10-19
Supplement: kiac481_supplementary_data.pdf [file kiac481_supplementary_data.pdf]

## Supplemental – Figures

**Supplemental Figure S1 Full frames of stacked fluorescence images of a mock and *Xanthomonas campestris* pv. *vesicatoria*  $\Delta$ *hrcN* infiltrated *Nicotiana benthamiana* plant. Representative full-frame images used for stromule counts in *FNR:eGFP* transgenic plants in response to the mock treatment (A) and treatment with *Xcv hrcN* (B). Scale bar is 10  $\mu$ m.**

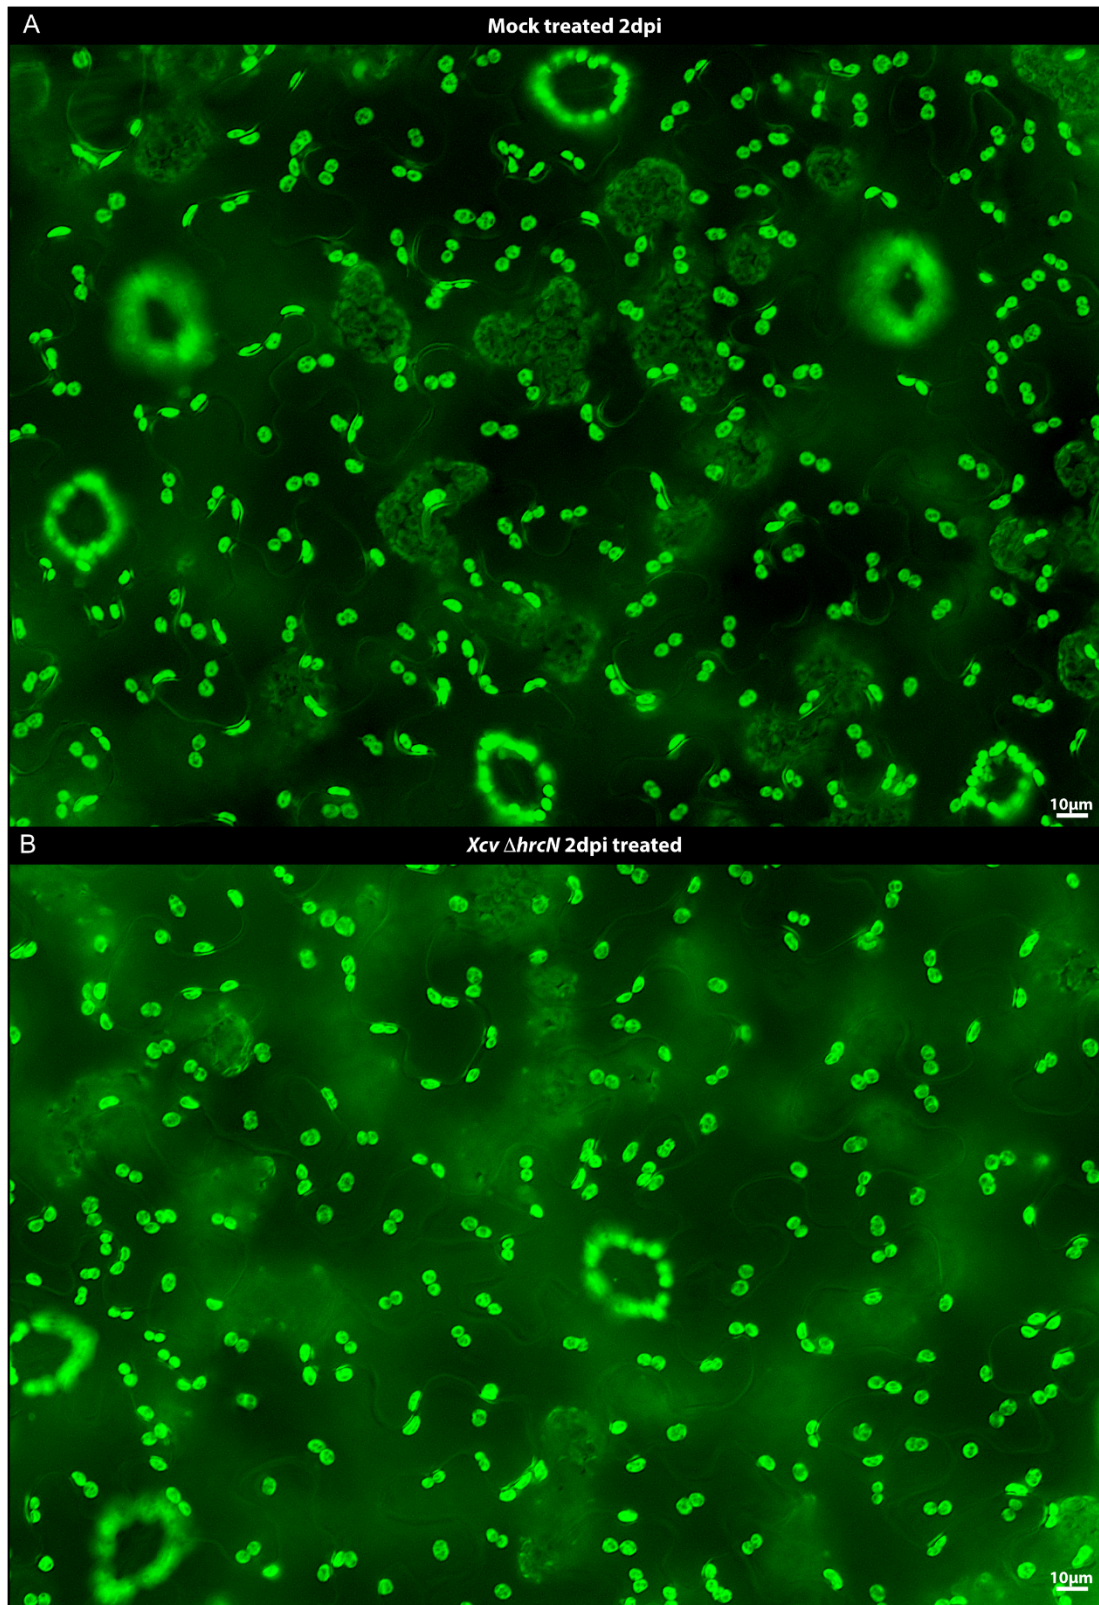

**Supplemental Figure S2 Full-frame of stacked fluorescence images of a *Xanthomonas campestris* pv. *vesicatoria* 85-10 and *Xcv*  $\Delta xopQ$  inoculated *Nicotiana benthamiana* plants. Representative full frame images used for stromule counts in *FNR:eGFP* transgenic plants in response to treatment with *Xcv* 85-10 (A) and treatment with *Xcv*  $\Delta xopQ$  (B).**

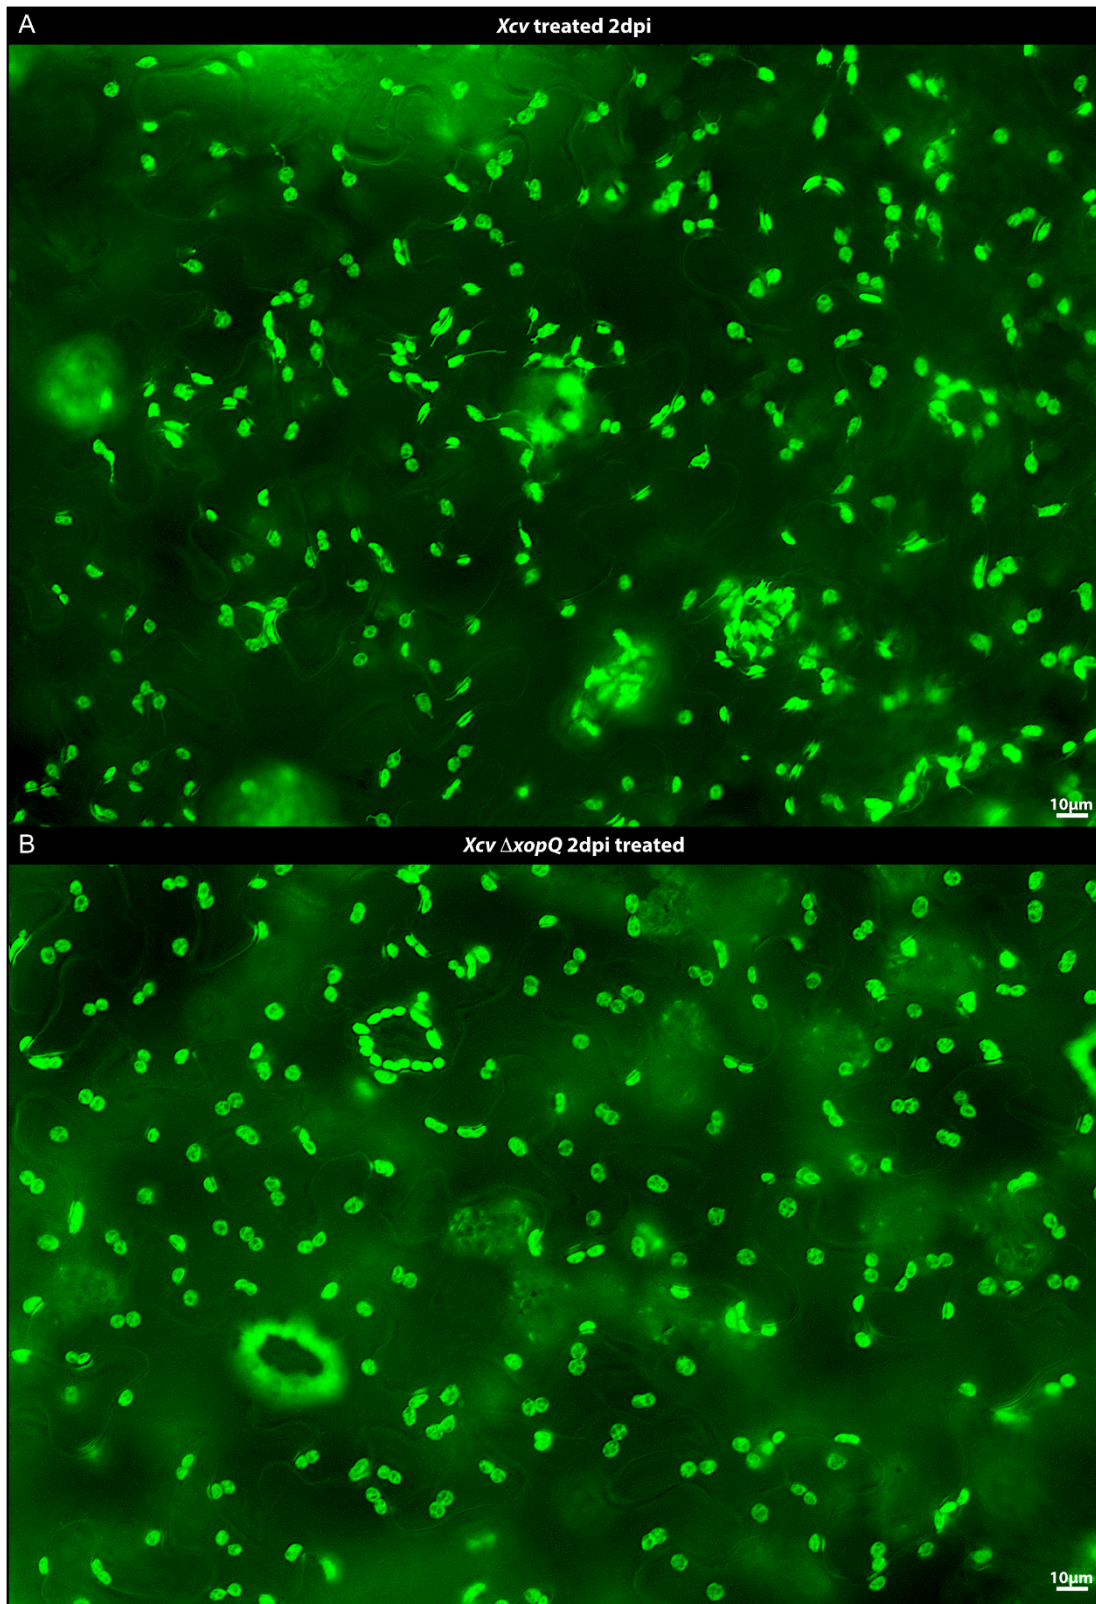

**Supplemental Figure S3 Moderate optical densities of GV3101 (pMP90) induce moderate stromule frequencies at 3 dpi.** (A) Box plot of stromule frequency in % (SF%), bars indicate significant differences based on a One-Way ANOVA analysis on transformed data. (SF%) in lower leaf epidermis cells of non-infiltrated (NI), agrobacterium infiltration medium (AIM)-infiltrated and GV3101 (pMP90)-infiltrated *N. benthamiana* *FNR:eGFP* plants. GV3101 (pMP90) mediates the expression of *mOrange2*. (B), (C) and (D) are representative sectors of images taken for stromule quantification. “n” = nucleus, arrow = stromule; scale bar corresponds to 10 $\mu$ m; green fluorescence originates from the *SSU:eGFP* plastid stroma marker (b, c and d) and the red fluorescence originates from the mORANGE2 fluorescence protein (d).

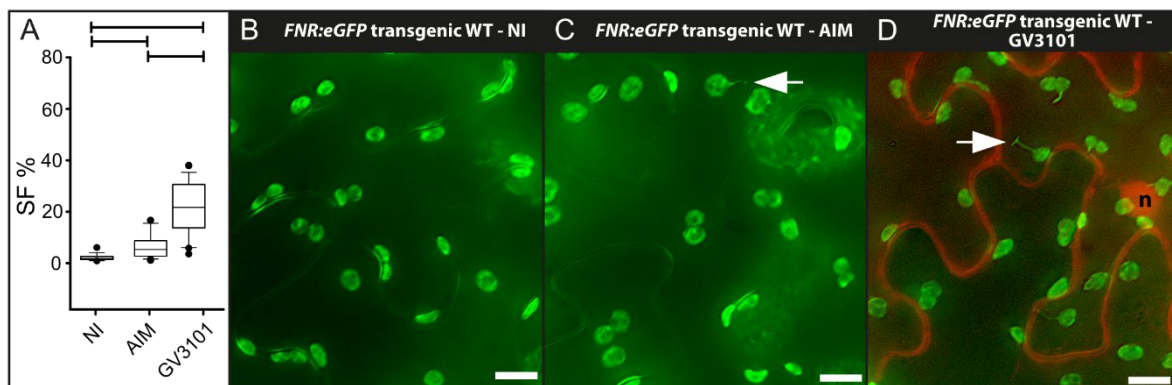

**Supplemental Figure S4 Full-frame stacked fluorescence images of an inoculated *Nicotiana benthamiana* wild-type plant.** Representative full frame images from the dataset used for stromule counts in WT in response to (A) *mOrange2+SSU:eGFP* and (B) *xopQ:mOrange2+SSU:eGFP*. Scale bars correspond to 10  $\mu$ m.

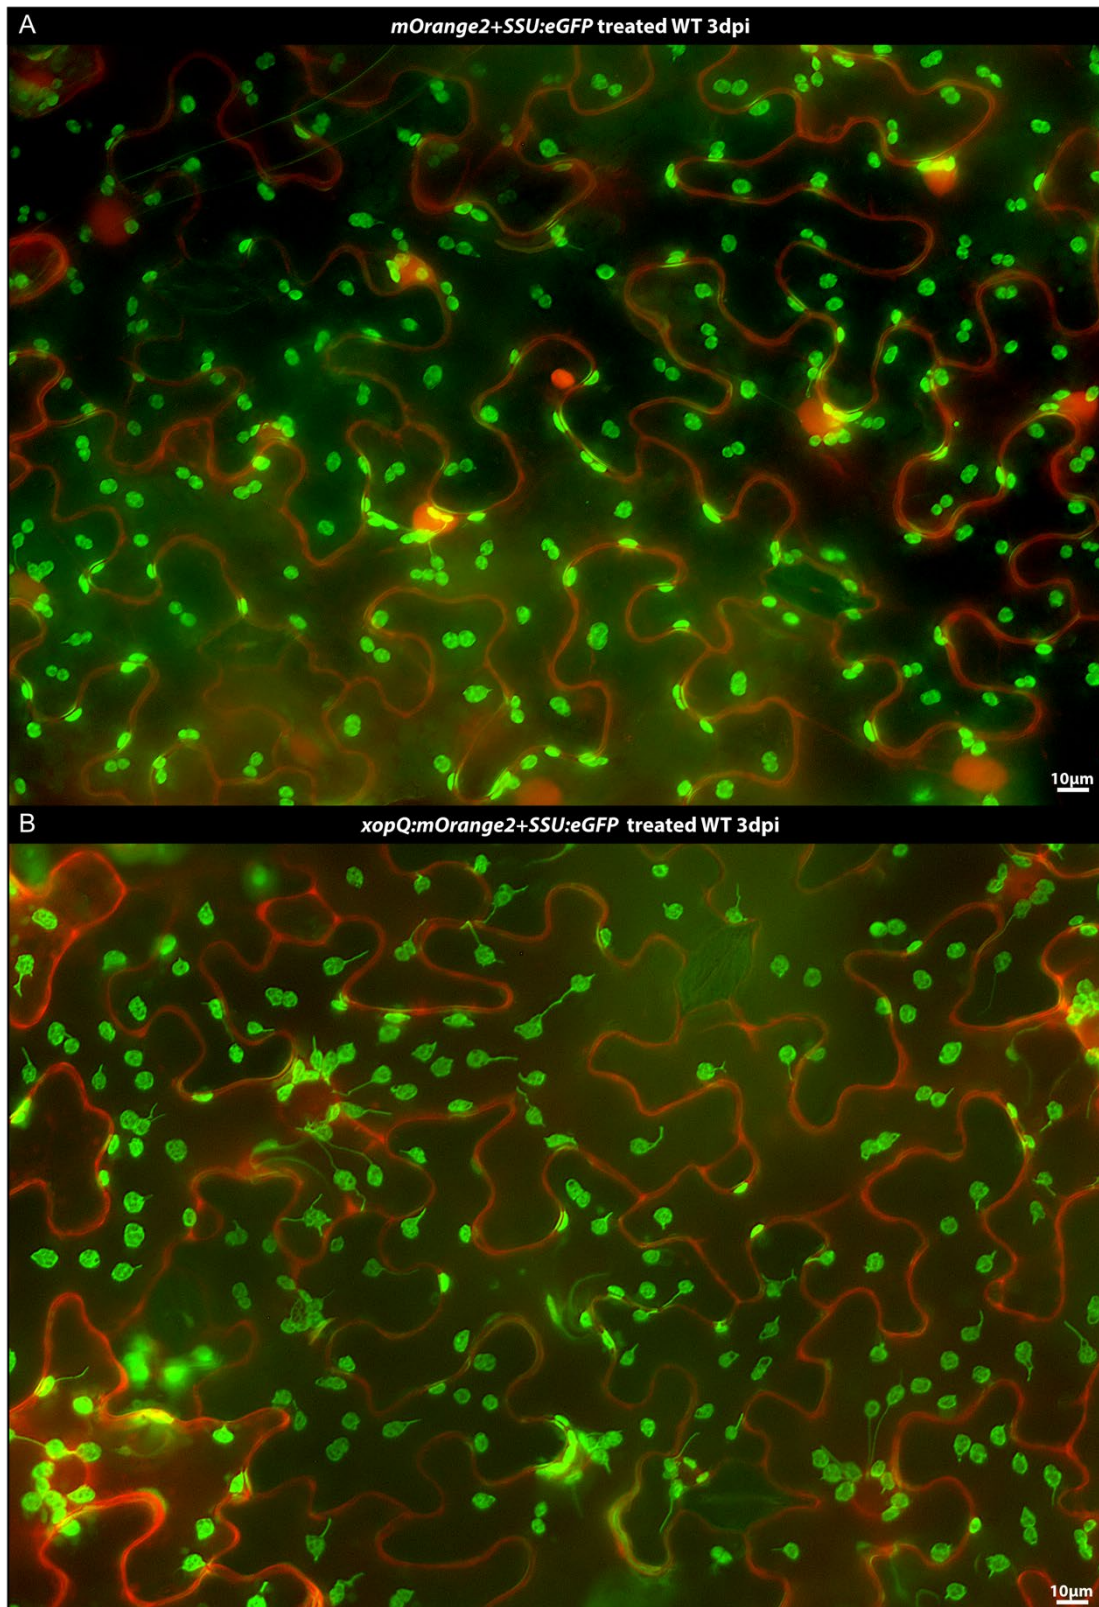

**Supplemental Figure S5 Full frame stacked fluorescence images of an inoculated *Nicotiana benthamiana roq1* plant.** Representative full-frame images used for stromule counts in *roq1-3* mutant in response to (A) *mOrange2+SSU:eGFP* and (B) *xopQ:mOrange2+SSU:eGFP*. Scale bars correspond to 10  $\mu$ m.

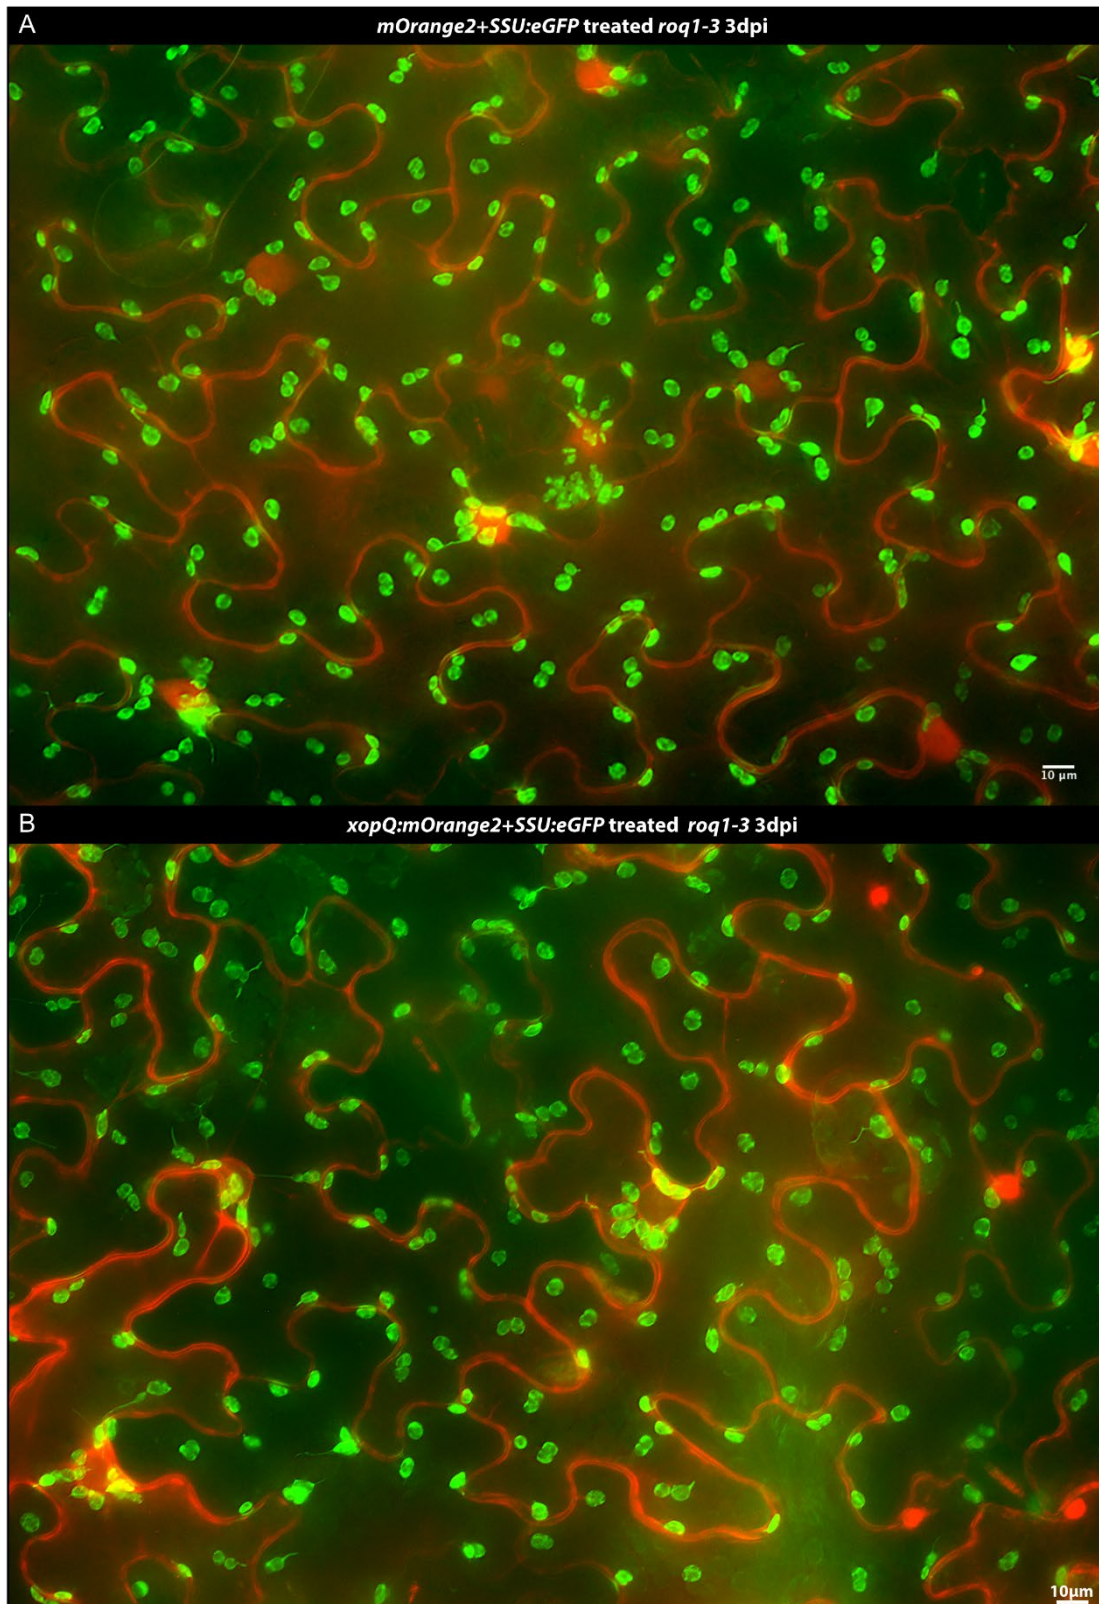

**Supplemental Figure S6 Full-frame stacked fluorescence images of an inoculated *Nicotiana benthamiana eds1* plant.** Representative full frame images from the dataset used for stromule counts in the *eds1a* mutant in response to (A) *mOrange2+SSU:eGFP* and (B) *xopQ:mOrange2+SSU:eGFP*. Scale bar corresponds to 10  $\mu\text{m}$ .

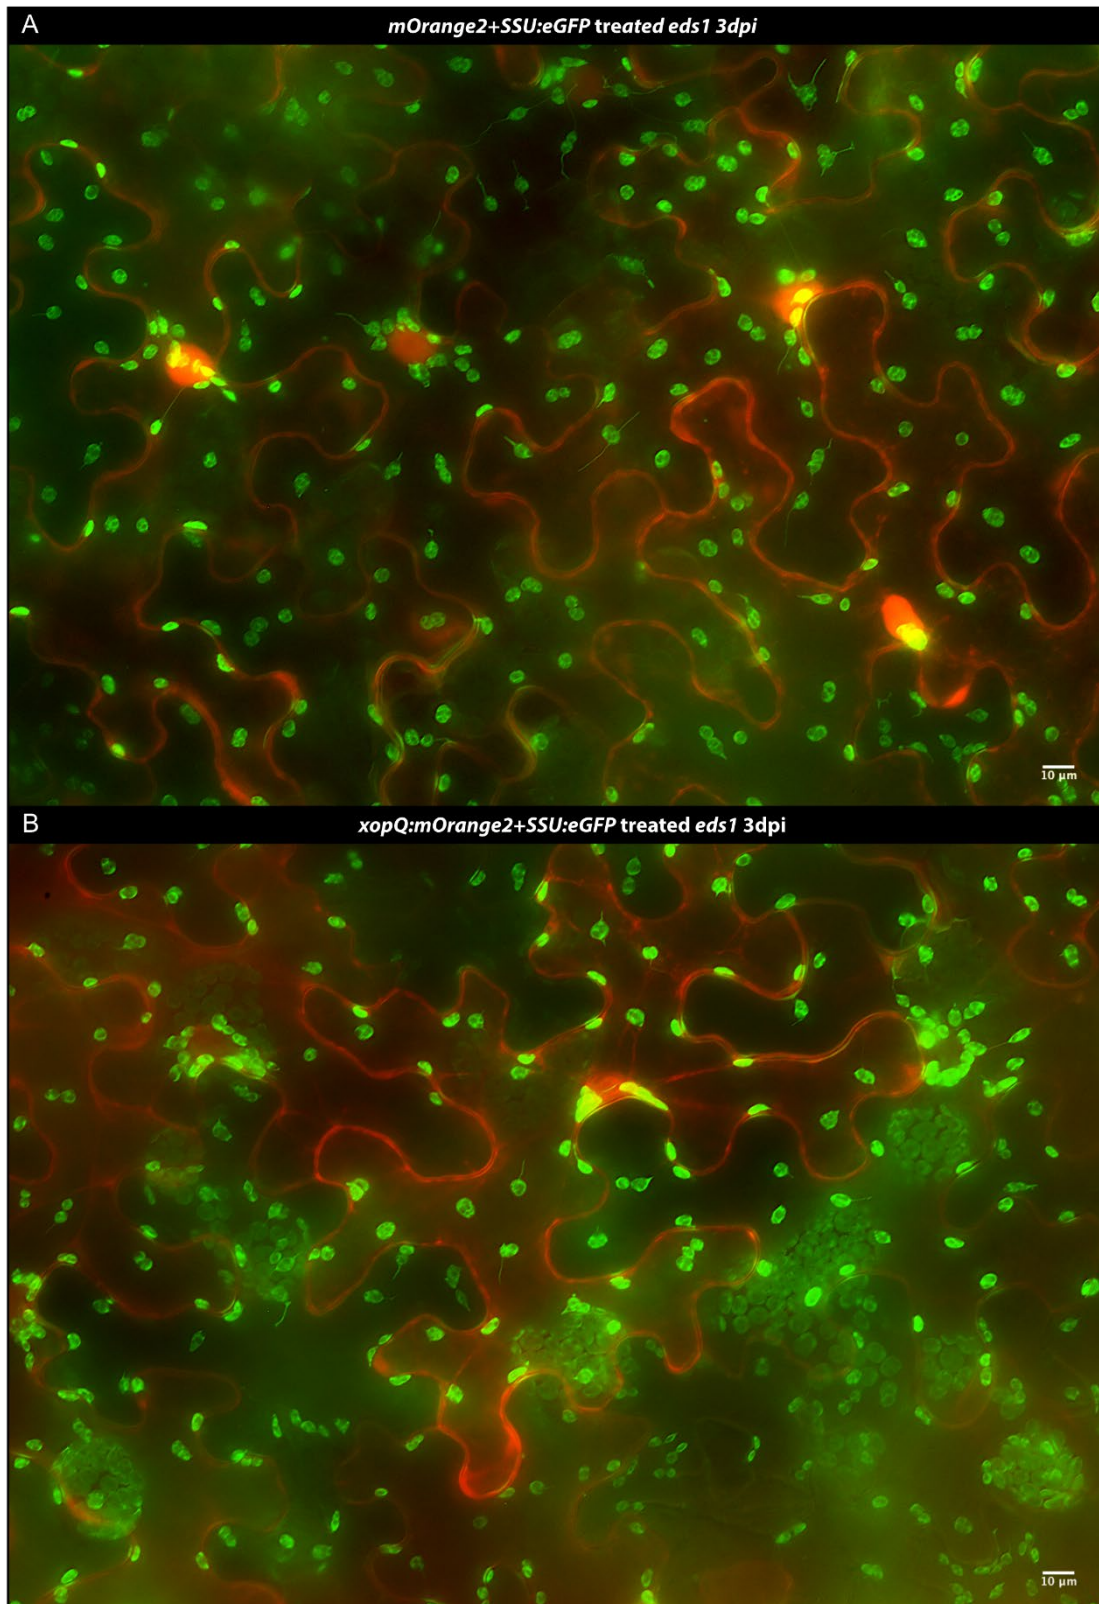

**Supplemental Figure S7 Full-frame stacked fluorescence images of an inoculated *Nicotiana benthamiana nrg1* plant.** Representative full-frame images used for stromule counts in the *nrg1-4* mutant in response to (A) *mOrange2+SSU:eGFP* and (B) *xopQ:mOrange2+SSU:eGFP*. Scale bar corresponds to 10  $\mu$ m.

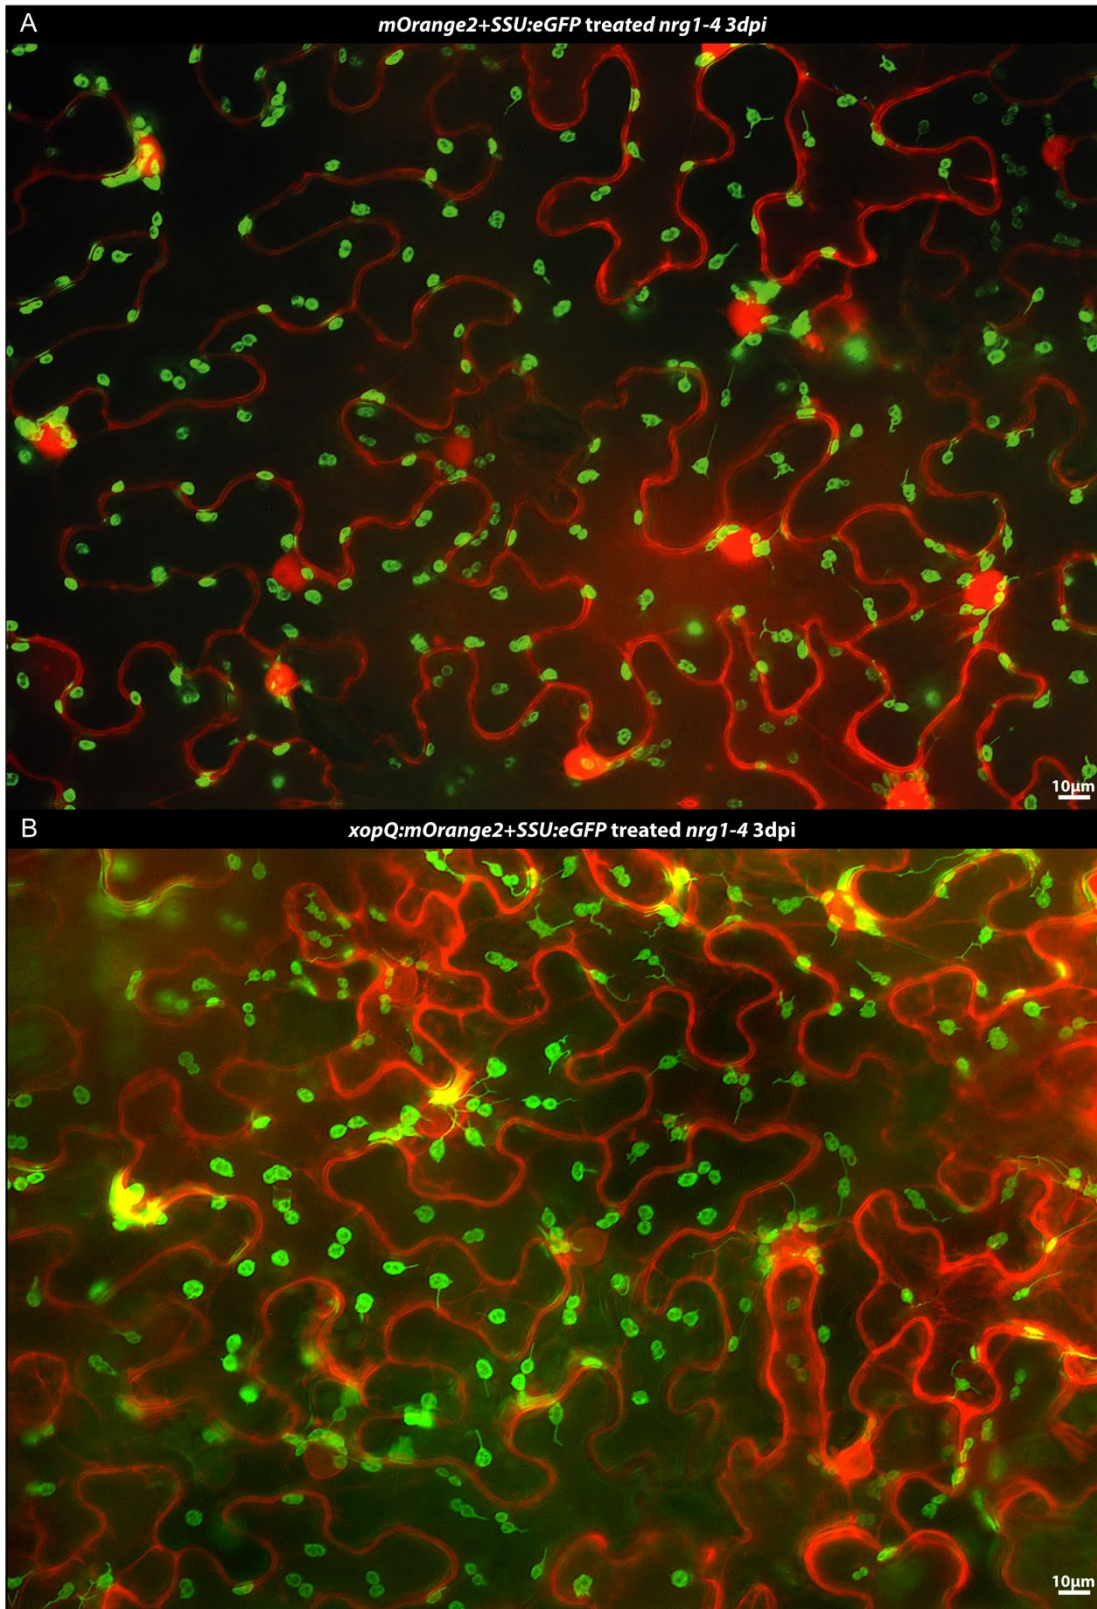



**Supplemental Figure S8 Macroscopic phenotype, SF% and PNAI in response to NRG1 over-expression in FNR:eGFP transgenic WT plants.** NI = not infiltrated, mOrange2 = *p35S::mOrange2*, XopQ = *p35S::XopQ:mOrange2*, NRG1 = *pNRG1::NRG1*, NRG1-tag = *pNRG1::NRG1:tag*; **(A)** macroscopic phenotype of infiltrated leaf tissue 10 dpi, lower = abaxial view of infiltrated leaf, upper = adaxial view of infiltrated leaf; strong cell death is visible by grey areas, mild cell death symptoms are visible by darker areas and are only visible from the abaxial side; **(B)** Box plot of stromule frequency in % (SF%), bars indicate significant differences based on a One-Way ANOVA analysis on transformed data. **(C)** plastid nucleus association index (PNAI), bars indicate significant differences based on a Kruskal-Wallis One Way analysis on ranks; **(D-H)** representative sections of stacked fluorescence images of infiltrated (**E-H**) and not infiltrated (**D**) tissue, GFP fluorescence of FNR:eGFP depicted in green (**D-H**) mOrange2 fluorescence depicted in red (**E-F**), arrow heads = plastids with stromules, white circles = position of nuclei, located by transmitted light images, n = nuclei, scale bar corresponds to 10  $\mu\text{m}$ .

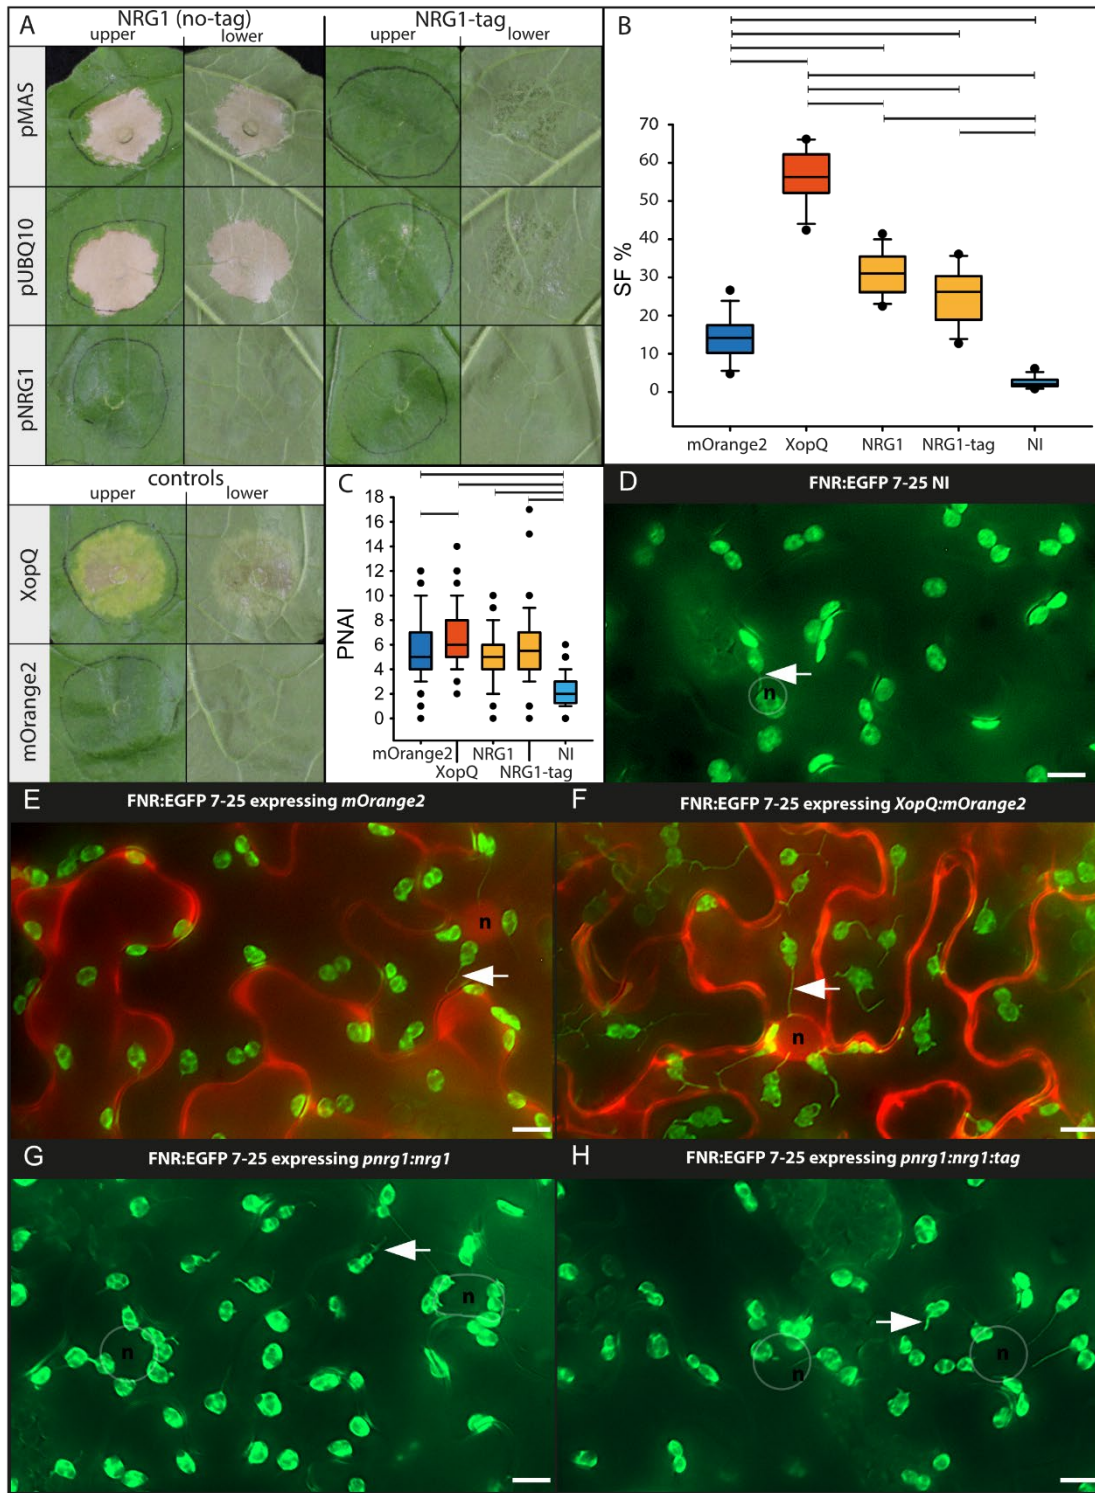

**Supplemental Figure S9 Full-frame stacked fluorescence images of an inoculated *Nicotiana benthamiana* *adr1\_nrg1* plant.** Representative full-frame images used for stromule counts in the *adr1\_nrg1* mutant in response to (A) *mOrange2+SSU:eGFP* and (B) *xopQ:mOrange2+SSU:eGFP*. Scale bar corresponds to 10  $\mu$ m.

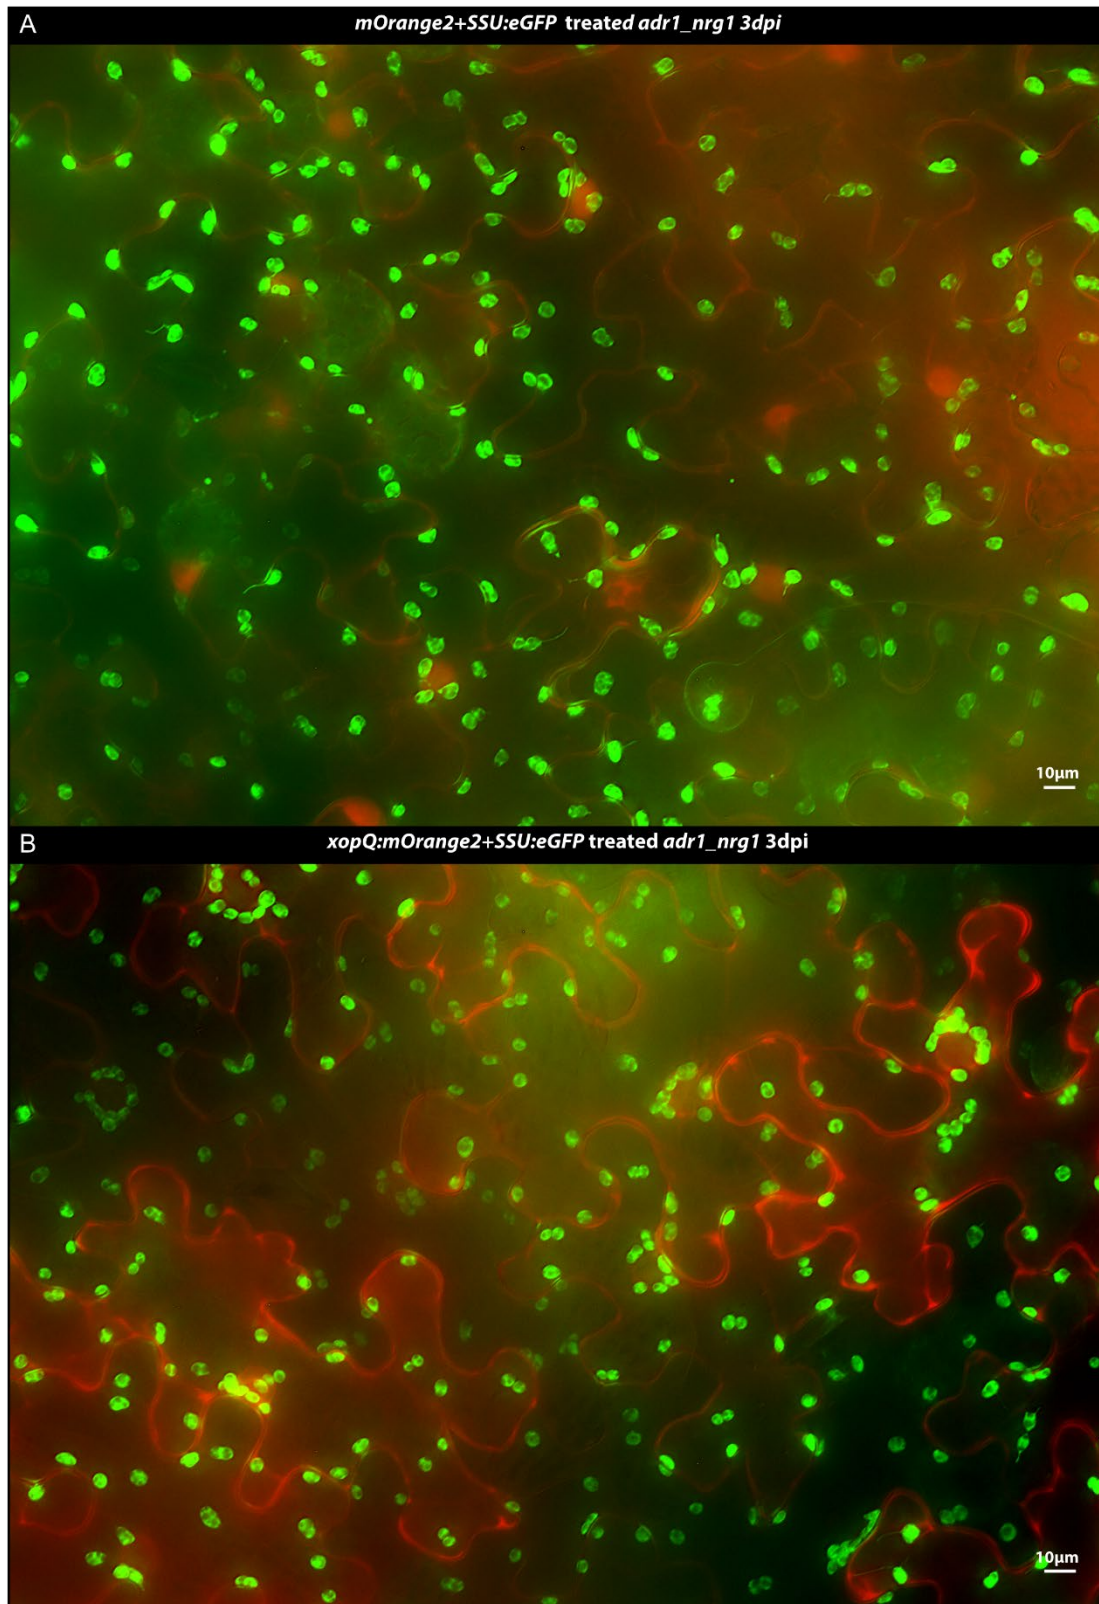

## **Supplemental – tables**

**Supplemental Table S1 Summary of SF% values used for stromule frequency bar blots in the main manuscript.** Values used for drawing box plots in Figure 1B, 2B, 3B, 4B and 5B; n = total number of plants used for respective treatment and genotype; SF% Mean = arithmetic average of stromule frequency values expressed in %; 25% = value for the 25 percentile; 75% = value of the 75 percentile; Median in %.

|                                   | n  | SF% Mean | Median | 25%   | 75%   |
|-----------------------------------|----|----------|--------|-------|-------|
| <b>Figure 1B</b>                  |    |          |        |       |       |
| Mock                              | 4  | 3.00     | 2.99   | 2.30  | 5.24  |
| <i>Xcv 85-10ΔhrcN</i>             | 4  | 3.80     | 2.82   | 1.24  | 8.81  |
| <i>Xcv 85-10ΔxopQ</i>             | 4  | 3.90     | 4.10   | 2.30  | 5.41  |
| <i>Xcv 85-10</i>                  | 4  | 32.3     | 32.40  | 23.80 | 39.70 |
| <b>Figure 2B</b>                  |    |          |        |       |       |
| <i>roq1-3</i> / mORANGE2          | 13 | 30.0     | 32.10  | 23.65 | 35.05 |
| <i>roq1-3</i> / XopQ              | 13 | 27.1     | 29.80  | 23.25 | 36.40 |
| <i>roq1-4</i> / mORANGE2          | 13 | 23.4     | 26.60  | 17.05 | 31.50 |
| <i>roq1-4</i> / XopQ: mORANGE2    | 13 | 22.8     | 24.30  | 18.60 | 25.95 |
| WT / mORANGE2                     | 13 | 25.0     | 22.40  | 18.00 | 32.40 |
| WT / XopQ: mORANGE2               | 13 | 55.1     | 62.90  | 37.10 | 69.20 |
| <b>Figure 3B</b>                  |    |          |        |       |       |
| <i>eds1a-1</i> / mORANGE2         | 11 | 12.5     | 13.90  | 7.16  | 17.80 |
| <i>eds1a-1</i> / XopQ             | 11 | 8.8      | 7.97   | 5.96  | 15.10 |
| WT / mORANGE2                     | 11 | 11.4     | 12.30  | 7.18  | 19.50 |
| WT / XopQ: mORANGE2               | 11 | 47.9     | 48.60  | 42.20 | 54.10 |
| <b>Figure 4B</b>                  |    |          |        |       |       |
| <i>nrg1-4</i> / mORANGE2          | 15 | 22.8     | 24.00  | 19.40 | 26.50 |
| <i>nrg1-4</i> / XopQ: mORANGE2    | 15 | 43.7     | 43.30  | 41.10 | 46.90 |
| <i>nrg1-5</i> / mORANGE2          | 15 | 24.6     | 23.60  | 20.70 | 31.00 |
| <i>nrg1-5</i> / XopQ: mORANGE2    | 15 | 47.1     | 43.40  | 40.30 | 50.20 |
| WT / mORANGE2                     | 15 | 28.1     | 25.50  | 21.60 | 35.10 |
| WT / XopQ: mORANGE2               | 15 | 63.7     | 64.70  | 55.30 | 72.10 |
| <b>Figure 5B</b>                  |    |          |        |       |       |
| <i>adr1_nrg1</i> / mORANGE2       | 15 | 27.8     | 26.90  | 22.16 | 30.14 |
| <i>adr1_nrg1</i> / XopQ: mORANGE2 | 15 | 28.8     | 27.58  | 23.50 | 36.30 |
| WT / mORANGE2                     | 9  | 32.5     | 28.53  | 27.78 | 38.72 |
| WT / XopQ: mORANGE2               | 9  | 54.9     | 56.57  | 46.83 | 63.15 |
| <b>Figure S3A</b>                 |    |          |        |       |       |
| NI                                | 16 | 2.1      | 1.7    | 1.3   | 2.6   |
| AIM                               | 22 | 6.3      | 5.3    | 2.7   | 8.7   |
| GV3101                            | 23 | 20.7     | 21.7   | 13.7  | 30.6  |

**Supplemental Table S2 summary of PNAI values used for box blots in the main**

**manuscript.** Values displayed in the PNAI box blots of Figure 6B. Infiltration = constructs co-infiltrated; plant line = genetic background used for experiment; n = number of nuclei included in the analysis. Lower numbers for *XopQ:mOrange2*-related experiments result from lower expression levels and therefore lower numbers of clearly defined nuclei. Median PNAI = median of the plastid nucleus association values; 25% = value for the 25 percentile; 75% = value of the 75 percentile.

| Expressed constructs            | plant line | n   | median PNAI | 25%  | 75%   |
|---------------------------------|------------|-----|-------------|------|-------|
| <i>mOrange2 + SSU:eGFP</i>      | wild-type  | 464 | 4           | 4    | 6     |
| <i>XopQ:mOrange2 + SSU:eGFP</i> | wild-type  | 297 | 6           | 5.75 | 7     |
| <i>mOrange2 + SSU:eGFP</i>      | roq1-3     | 95  | 5           | 4    | 6     |
| <i>XopQ:mOrange2 + SSU:eGFP</i> | roq1-3     | 61  | 7           | 6    | 9     |
| <i>mOrange2 + SSU:eGFP</i>      | eds1a-1    | 90  | 5           | 3    | 7     |
| <i>XopQ:mOrange2 + SSU:eGFP</i> | eds1a-1    | 66  | 8           | 5    | 10    |
| <i>mOrange2 + SSU:eGFP</i>      | nrg1-4     | 126 | 4           | 3    | 5     |
| <i>XopQ:mOrange2 + SSU:eGFP</i> | nrg1-4     | 113 | 6           | 5    | 7     |
| <i>mOrange2 + SSU:eGFP</i>      | nrg1_adr1  | 249 | 5           | 3    | 6     |
| <i>XopQ:mOrange2 + SSU:eGFP</i> | nrg1_adr1  | 102 | 8           | 6    | 10.25 |

**Supplemental Table S3 Values used for SF% bar plots in supplemental figure Figure S3A.** n = total number of plants used for respective treatment and genotype; SF% Mean = arithmetic average of stromule frequency values expressed in %; C.I. of Mean 95% lower = absolute value of the lower 95% confidence interval of the presented mean; C.I. of Mean 95% upper = absolute value of the upper 95% confidence interval of the presented mean; difference C.I. Mean 95% lower = difference of mean and the absolute value of the lower 95% confidence interval; difference C.I. Mean 95% upper = difference of the absolute value of the 95% upper confidence interval and the mean; the difference values have been used to blot the whiskers in the bar blots.

|                      | n  | SF% Mean | C.I. of Mean<br>95% lower | C.I. of Mean<br>95% upper | difference C.I.<br>Mean 95% lower | difference C.I. Mean<br>95% upper |
|----------------------|----|----------|---------------------------|---------------------------|-----------------------------------|-----------------------------------|
| None infiltrated     | 16 | 2        | 1.4                       | 2.6                       | 0.5                               | 0.6                               |
| AIM – buffer control | 22 | 5.7      | 3.9                       | 7.7                       | 1.7                               | 2                                 |
| mORANGE2             | 23 | 19.7     | 15.4                      | 24.4                      | 4.3                               | 4.7                               |

**Supplemental Table S4 Values used for SF% box plots in supplemental figure Figure S9B.** Expressed constructs = constructs infiltrated; plant line = genetic background used for experiment; n = number of plants included in the analysis. Median SF% = median of stromule frequency values expressed in %; 25% = value for the 25 percentile; 75% = value of the 75 percentile.

| Expressed constructs      | plant line    | n  | median SF% | 25%  | 75%  |
|---------------------------|---------------|----|------------|------|------|
| <i>p35S:mOrange2</i>      | FNR EGFP 7-25 | 13 | 14.2       | 10.2 | 17.5 |
| <i>p35S:XopQ:mOrange2</i> | FNR EGFP 7-25 | 13 | 56.3       | 52.2 | 62.3 |
| <i>pNRG1:NRG1</i>         | FNR EGFP 7-25 | 13 | 31.0       | 26.1 | 35.5 |
| <i>pNRG1:NRG1:tag</i>     | FNR EGFP 7-25 | 13 | 26.2       | 18.9 | 30.3 |
| <i>NI</i>                 | FNR EGFP 7-25 | 13 | 2.1        | 1.5  | 3.2  |



**Supplemental Table S5 Values used for PNAI box plots in supplemental figure Figure S9D.** Expressed constructs = constructs infiltrated; plant line = genetic background used for experiment; n = number of nuclei included in the analysis. Median PNAI = median of stromule frequency values expressed in %; 25% = value for the 25 percentile; 75% = value of the 75 percentile.

| Expressed constructs      | plant line    | N  | median PNAI | 25%  | 75% |
|---------------------------|---------------|----|-------------|------|-----|
| <i>p35S:mOrange2</i>      | FNR EGFP 7-25 | 85 | 5           | 4    | 7   |
| <i>p35S:XopQ:mOrange2</i> | FNR EGFP 7-25 | 83 | 6           | 5    | 8   |
| <i>pNRG1:NRG1</i>         | FNR EGFP 7-25 | 60 | 5           | 4    | 6   |
| <i>pNRG1:NRG1:tag</i>     | FNR EGFP 7-25 | 64 | 5.5         | 4    | 7   |
| <i>NI</i>                 | FNR EGFP 7-25 | 67 | 2           | 1.25 | 3   |

**Supplemental material – statistics**

**Supplemental Statistics S1** - SF was treated as a measurement variable. The different treatments were treated as nominal variable. Because SF is a proportion the values were arcsine transformed before further testing.

**Descriptive Statistics:**

| Column      | Size | Missing | Mean  | Std Dev | Std. Error | C.I. of Mean |
|-------------|------|---------|-------|---------|------------|--------------|
| xcv trans   | 12   | 0       | 0.894 | 0.139   | 0.0400     | 0.0880       |
| harcN trans | 12   | 0       | 0.448 | 0.126   | 0.0364     | 0.0802       |
| XopQ trans  | 12   | 0       | 0.460 | 0.0691  | 0.0199     | 0.0439       |
| moc trans   | 12   | 0       | 0.411 | 0.141   | 0.0406     | 0.0893       |

| Column      | Range | Max   | Min   | Median | 25%   | 75%   |
|-------------|-------|-------|-------|--------|-------|-------|
| xcv trans   | 0.493 | 1.136 | 0.644 | 0.891  | 0.795 | 0.972 |
| harcN trans | 0.357 | 0.662 | 0.305 | 0.422  | 0.340 | 0.579 |
| XopQ trans  | 0.233 | 0.576 | 0.343 | 0.468  | 0.400 | 0.506 |
| moc trans   | 0.562 | 0.562 | 0.000 | 0.424  | 0.391 | 0.497 |

| Column      | Skewness | Kurtosis  | K-S Dist. | K-S Prob. | SWilk | WSWilk | Prob |
|-------------|----------|-----------|-----------|-----------|-------|--------|------|
| xcv trans   | 0.116    | -0.000154 | 0.116     | 0.795     | 0.981 | 0.988  |      |
| harcN trans | 0.592    | -1.077    | 0.179     | 0.340     | 0.903 | 0.173  |      |
| XopQ trans  | -0.171   | -0.559    | 0.124     | 0.761     | 0.980 | 0.984  |      |
| moc trans   | -2.505   | 7.736     | 0.347     | <0.001    | 0.706 | <0.001 |      |

| Column      | Sum    | Sum of Squares |
|-------------|--------|----------------|
| xcv trans   | 10.733 | 9.810          |
| harcN trans | 5.378  | 2.585          |
| XopQ trans  | 5.522  | 2.593          |
| moc trans   | 4.927  | 2.241          |

**One Way Analysis of Variance**

Normality Test (Shapiro-Wilk) Passed (P = 0.080)  
 Equal Variance Test: Passed (P = 0.399)

| Group Name  | N  | Missing | Mean  | Std Dev | SEM    |
|-------------|----|---------|-------|---------|--------|
| xcv trans   | 12 | 0       | 0.894 | 0.139   | 0.0400 |
| harcN trans | 12 | 0       | 0.448 | 0.126   | 0.0364 |
| XopQ trans  | 12 | 0       | 0.460 | 0.0691  | 0.0199 |
| moc trans   | 12 | 0       | 0.411 | 0.141   | 0.0406 |

| Source of Variation | DF | SS    | MS     | F      | P      |
|---------------------|----|-------|--------|--------|--------|
| Between Groups      | 3  | 1.877 | 0.626  | 41.972 | <0.001 |
| Residual            | 44 | 0.656 | 0.0149 |        |        |
| Total               | 47 | 2.533 |        |        |        |

The differences in the mean values among the treatment groups are greater than would be expected by chance; there is a statistically significant difference (P = <0.001).

Power of performed test with alpha = 0.050: 1.000

**All Pairwise Multiple Comparison Procedures (Tukey Test):**

| Comparison                 | Diff of Means | p | q      | P      | P<0.050     |
|----------------------------|---------------|---|--------|--------|-------------|
| xcv trans vs. moc trans    | 0.484         | 4 | 13.725 | <0.001 | Yes         |
| xcv trans vs. harcN trans  | 0.446         | 4 | 12.660 | <0.001 | Yes         |
| xcv trans vs. XopQ trans   | 0.434         | 4 | 12.320 | <0.001 | Yes         |
| XopQ trans vs. moc trans   | 0.0495        | 4 | 1.405  | 0.754  | No          |
| XopQ trans vs. harcN trans | 0.0120        | 4 | 0.340  | 0.995  | Do Not Test |
| harcN trans vs. moc trans  | 0.0375        | 4 | 1.065  | 0.875  | Do Not Test |

A result of "Do Not Test" occurs for a comparison when no significant difference is found between two means that enclose that comparison. For example, if you had four means sorted in order, and found no difference between means 4 vs. 2, then you would not test 4 vs. 3 and 3 vs. 2, but still test 4 vs. 1 and 3 vs. 1 (4 vs. 3 and 3 vs. 2 are enclosed by 4 vs. 2: 4 3 2 1). Note that not testing the enclosed means is a procedural rule, and a result of Do Not Test should be treated as if there is no significant difference between the means, even though one may appear to exist.

**Supplemental Statistics S2 - SF** was treated as a measurement variable. The different treatments were treated as nominal variable. Because SF is a proportion the values were arcsine transformed before further testing.

**Descriptive Statistics:**

| Column            | Size | Missing | Mean  | Std Dev | Std. Error | C.I. of Mean |
|-------------------|------|---------|-------|---------|------------|--------------|
| tr Roq1/3 mOrange | 13   | 0       | 0.580 | 0.0700  | 0.0194     | 0.0423       |
| tr Roq1/3 XopQ    | 13   | 0       | 0.547 | 0.132   | 0.0366     | 0.0797       |
| tr Roq1/4 mOrange | 13   | 0       | 0.505 | 0.115   | 0.0319     | 0.0696       |
| tr Roq1/4 XopQ    | 13   | 0       | 0.498 | 0.0665  | 0.0184     | 0.0402       |
| tr WT mOrange     | 13   | 0       | 0.524 | 0.127   | 0.0353     | 0.0769       |
| tr WT XopQ        | 13   | 0       | 0.836 | 0.183   | 0.0509     | 0.111        |

| Column            | Range | Max   | Min   | Median | 25%   | 75%   |
|-------------------|-------|-------|-------|--------|-------|-------|
| tr Roq1/3 mOrange | 0.222 | 0.709 | 0.487 | 0.602  | 0.508 | 0.633 |
| tr Roq1/3 XopQ    | 0.444 | 0.699 | 0.255 | 0.577  | 0.502 | 0.647 |
| tr Roq1/4 mOrange | 0.373 | 0.657 | 0.284 | 0.542  | 0.425 | 0.595 |
| tr Roq1/4 XopQ    | 0.228 | 0.603 | 0.375 | 0.515  | 0.446 | 0.534 |
| tr WT mOrange     | 0.466 | 0.787 | 0.321 | 0.492  | 0.437 | 0.605 |
| tr WT XopQ        | 0.540 | 1.131 | 0.591 | 0.915  | 0.655 | 0.982 |

| Column            | Skewness | Kurtosis | K-S Dist. | K-S Prob. | SWilk | WSilk |
|-------------------|----------|----------|-----------|-----------|-------|-------|
| tr Roq1/3 mOrange | 0.235    | -0.908   | 0.164     | 0.414     | 0.941 | 0.469 |
| tr Roq1/3 XopQ    | -1.087   | 0.902    | 0.177     | 0.309     | 0.897 | 0.121 |
| tr Roq1/4 mOrange | -0.695   | -0.406   | 0.165     | 0.404     | 0.941 | 0.470 |
| tr Roq1/4 XopQ    | -0.426   | -0.252   | 0.159     | 0.456     | 0.958 | 0.716 |
| tr WT mOrange     | 0.461    | 0.271    | 0.138     | 0.633     | 0.969 | 0.883 |
| tr WT XopQ        | -0.0613  | -1.607   | 0.213     | 0.108     | 0.882 | 0.076 |

| Column            | Sum    | Sum of Squares |
|-------------------|--------|----------------|
| tr Roq1/3 mOrange | 7.536  | 4.427          |
| tr Roq1/3 XopQ    | 7.109  | 4.096          |
| tr Roq1/4 mOrange | 6.564  | 3.473          |
| tr Roq1/4 XopQ    | 6.469  | 3.272          |
| tr WT mOrange     | 6.813  | 3.765          |
| tr WT XopQ        | 10.874 | 9.500          |

**One Way Analysis of Variance**

Normality Test (Shapiro-Wilk) Passed (P = 0.395)  
 Equal Variance Test: Failed (P < 0.050)

| Group Name        | N  | Missing | Mean  | Std Dev | SEM    |
|-------------------|----|---------|-------|---------|--------|
| tr Roq1/3 mOrange | 13 | 0       | 0.580 | 0.0700  | 0.0194 |
| tr Roq1/3 XopQ    | 13 | 0       | 0.547 | 0.132   | 0.0366 |
| tr Roq1/4 mOrange | 13 | 0       | 0.505 | 0.115   | 0.0319 |
| tr Roq1/4 XopQ    | 13 | 0       | 0.498 | 0.0665  | 0.0184 |
| tr WT mOrange     | 13 | 0       | 0.524 | 0.127   | 0.0353 |
| tr WT XopQ        | 13 | 0       | 0.836 | 0.183   | 0.0509 |

| Source of Variation | DF | SS    | MS     | F      | P      |
|---------------------|----|-------|--------|--------|--------|
| Between Groups      | 5  | 1.071 | 0.214  | 14.310 | <0.001 |
| Residual            | 72 | 1.078 | 0.0150 |        |        |
| Total               | 77 | 2.149 |        |        |        |

The differences in the mean values among the treatment groups are greater than would be expected by chance; there is a statistically significant difference (P = <0.001).  
 Power of performed test with alpha = 0.050: 1.000

**All Pairwise Multiple Comparison Procedures (Tukey Test):**

| Comparison                           | Diff of Means | p | q     | P      | P<0.050     |
|--------------------------------------|---------------|---|-------|--------|-------------|
| tr WT XopQ vs. tr Roq1/4 XopQ        | 0.339         | 6 | 9.984 | <0.001 | Yes         |
| tr WT XopQ vs. tr Roq1/4 mOrange     | 0.332         | 6 | 9.769 | <0.001 | Yes         |
| tr WT XopQ vs. tr WT mOrange         | 0.312         | 6 | 9.205 | <0.001 | Yes         |
| tr WT XopQ vs. tr Roq1/3 XopQ        | 0.290         | 6 | 8.534 | <0.001 | Yes         |
| tr WT XopQ vs. tr Roq1/3 mOrange     | 0.257         | 6 | 7.566 | <0.001 | Yes         |
| tr Roq1/3 mOrange vs. tr Roq1/4 XopQ | 0.0821        | 6 | 2.418 | 0.530  | No          |
| tr Roq1/3 mOran vs. tr Roq1/4 mOran  | 0.0748        | 6 | 2.203 | 0.629  | Do Not Test |
| tr Roq1/3 mOrange vs. tr WT mOrange  | 0.0556        | 6 | 1.639 | 0.855  | Do Not Test |
| tr Roq1/3 mOrange vs. tr Roq1/3 XopQ | 0.0328        | 6 | 0.968 | 0.983  | Do Not Test |
| tr Roq1/3 XopQ vs. tr Roq1/4 XopQ    | 0.0492        | 6 | 1.451 | 0.908  | Do Not Test |
| tr Roq1/3 XopQ vs. tr Roq1/4 mOrange | 0.0419        | 6 | 1.235 | 0.952  | Do Not Test |
| tr Roq1/3 XopQ vs. tr WT mOrange     | 0.0228        | 6 | 0.671 | 0.997  | Do Not Test |
| tr WT mOrange vs. tr Roq1/4 XopQ     | 0.0265        | 6 | 0.780 | 0.994  | Do Not Test |
| tr WT mOrange vs. tr Roq1/4 mOrange  | 0.0192        | 6 | 0.564 | 0.999  | Do Not Test |
| tr Roq1/4 mOrange vs. tr Roq1/4 XopQ | 0.00731       | 6 | 0.215 | 1.000  | Do Not Test |

A result of "Do Not Test" occurs for a comparison when no significant difference is found between two means that enclose that comparison. For example, if you had four means sorted in order, and found no difference between means 4 vs. 2, then you would not test 4 vs. 3 and 3 vs. 2, but still test 4 vs. 1 and 3 vs. 1 (4 vs. 3 and 3 vs. 2 are enclosed by 4 vs. 2: 4 3 2 1). Note that not testing the enclosed means is a procedural rule, and a result of Do Not Test should be treated as if there is no significant difference between the means, even though one may appear to exist.

**Supplemental Statistics S3 - SF** was treated as a measurement variable. The different treatments were treated as nominal variable. Because SF is a proportion the values were arcsine transformed before further testing.

**Descriptive Statistics:**

| Column Size | Missing | Mean | Std Dev | Std. Error | C.I. of Mean |        |  |
|-------------|---------|------|---------|------------|--------------|--------|--|
| tr eds1 mO  | 11      | 0    | 0.368   | 0.100      | 0.0302       | 0.0673 |  |
| tr eds1 XQ  | 11      | 0    | 0.308   | 0.0846     | 0.0255       | 0.0568 |  |
| tr WT mO    | 11      | 0    | 0.359   | 0.124      | 0.0372       | 0.0830 |  |
| tr WT XQ    | 11      | 0    | 0.765   | 0.0727     | 0.0219       | 0.0488 |  |

  

| Column Range | Max   | Min   | Median | 25%   | 75%   |       |
|--------------|-------|-------|--------|-------|-------|-------|
| tr eds1 mO   | 0.341 | 0.546 | 0.205  | 0.381 | 0.271 | 0.435 |
| tr eds1 XQ   | 0.246 | 0.457 | 0.210  | 0.286 | 0.247 | 0.399 |
| tr WT mO     | 0.361 | 0.546 | 0.185  | 0.359 | 0.271 | 0.457 |
| tr WT XQ     | 0.241 | 0.877 | 0.635  | 0.771 | 0.707 | 0.826 |

  

| Column Skewness | Kurtosis | K-S Dist. | K-S Prob. | SWilk | WSWilk | Prob  |
|-----------------|----------|-----------|-----------|-------|--------|-------|
| tr eds1 mO      | -0.00880 | -0.219    | 0.132     | 0.737 | 0.975  | 0.934 |
| tr eds1 XQ      | 0.913    | -0.575    | 0.282     | 0.014 | 0.860  | 0.057 |
| tr WT mO        | 0.261    | -0.940    | 0.129     | 0.750 | 0.947  | 0.601 |
| tr WT XQ        | -0.0396  | -0.323    | 0.158     | 0.551 | 0.972  | 0.908 |

  

| Column Sum      | Sum of Squares |       |
|-----------------|----------------|-------|
| eds1 mOrange SF | 1.500          | 0.249 |
| eds1 XopQ SF    | 1.068          | 0.132 |
| WT mOrange SF   | 1.471          | 0.265 |
| WT XopQ SF      | 5.276          | 2.583 |
| tr eds1 mO      | 4.052          | 1.593 |
| tr eds1 XQ      | 3.389          | 1.116 |
| tr WT mO        | 3.951          | 1.571 |
| tr WT XQ        | 8.413          | 6.488 |

**One Way Analysis of Variance**

Normality Test (Shapiro-Wilk) Passed (P = 0.432)  
 Equal Variance Test: Passed (P = 0.279)

| Group Name | N  | Missing | Mean  | Std Dev | SEM    |
|------------|----|---------|-------|---------|--------|
| tr eds1 mO | 11 | 0       | 0.368 | 0.100   | 0.0302 |
| tr eds1 XQ | 11 | 0       | 0.308 | 0.0846  | 0.0255 |
| tr WT mO   | 11 | 0       | 0.359 | 0.124   | 0.0372 |
| tr WT XQ   | 11 | 0       | 0.765 | 0.0727  | 0.0219 |

| Source of Variation | DF | SS    | MS      | F      | P      |
|---------------------|----|-------|---------|--------|--------|
| Between Groups      | 3  | 1.476 | 0.492   | 52.148 | <0.001 |
| Residual            | 40 | 0.377 | 0.00944 |        |        |
| Total               | 43 | 1.853 |         |        |        |

The differences in the mean values among the treatment groups are greater than would be expected by chance; there is a statistically significant difference (P = <0.001).  
 Power of performed test with alpha = 0.050: 1.000

**All Pairwise Multiple Comparison Procedures (Tukey Test):**

Comparisons for factor:

| Comparison                | Diff of Means | p | q      | P      | P<0.050     |
|---------------------------|---------------|---|--------|--------|-------------|
| tr WT XQ vs. tr eds1 XQ   | 0.457         | 4 | 15.595 | <0.001 | Yes         |
| tr WT XQ vs. tr WT mO     | 0.406         | 4 | 13.852 | <0.001 | Yes         |
| tr WT XQ vs. tr eds1 mO   | 0.397         | 4 | 13.539 | <0.001 | Yes         |
| tr eds1 mO vs. tr eds1 XQ | 0.0602        | 4 | 2.056  | 0.474  | No          |
| tr eds1 mO vs. tr WT mO   | 0.00918       | 4 | 0.313  | 0.996  | Do Not Test |
| tr WT mO vs. tr eds1 XQ   | 0.0510        | 4 | 1.743  | 0.610  | Do Not Test |

A result of "Do Not Test" occurs for a comparison when no significant difference is found between two means that enclose that comparison. For example, if you had four means sorted in order, and found no difference between means 4 vs. 2, then you would not test 4 vs. 3 and 3 vs. 2, but still test 4 vs. 1 and 3 vs. 1 (4 vs. 3 and 3 vs. 2 are enclosed by 4 vs. 2: 4 3 2 1). Note that not testing the enclosed means is a procedural rule, and a result of Do Not Test should be treated as if there is no significant difference between the means, even though one may appear to exist.

**Supplemental Statistics S4 - SF** was treated as a measurement variable. The different treatments were treated as nominal variable. Because SF is a proportion the values were arcsine transformed before further testing.

Descriptive Statistics:

| Column             | Size | Missing | Mean  | Std Dev | Std. Error | C.I. of Mean |
|--------------------|------|---------|-------|---------|------------|--------------|
| tr nrg1-4 mOrange2 | 15   | 0       | 0.498 | 0.0672  | 0.0174     | 0.0372       |
| tr nrg1-4 XopQ     | 15   | 0       | 0.722 | 0.0420  | 0.0108     | 0.0232       |
| tr nrg1-5 mOrange2 | 15   | 0       | 0.519 | 0.0825  | 0.0213     | 0.0457       |
| tr nrg1-5 XopQ     | 15   | 0       | 0.756 | 0.0841  | 0.0217     | 0.0466       |
| tr WT mOrange2     | 15   | 0       | 0.559 | 0.105   | 0.0270     | 0.0579       |
| tr WT XopQ         | 15   | 0       | 0.924 | 0.117   | 0.0302     | 0.0648       |

| Column             | Range | Max   | Min   | Median | 25%   | 75%   |
|--------------------|-------|-------|-------|--------|-------|-------|
| tr nrg1-4 mOrange2 | 0.227 | 0.595 | 0.367 | 0.512  | 0.456 | 0.541 |
| tr nrg1-4 XopQ     | 0.138 | 0.791 | 0.652 | 0.718  | 0.696 | 0.754 |
| tr nrg1-5 mOrange2 | 0.252 | 0.638 | 0.386 | 0.507  | 0.472 | 0.591 |
| tr nrg1-5 XopQ     | 0.258 | 0.918 | 0.660 | 0.720  | 0.688 | 0.787 |
| tr WT mOrange2     | 0.350 | 0.752 | 0.402 | 0.529  | 0.484 | 0.634 |
| tr WT XopQ         | 0.402 | 1.118 | 0.715 | 0.934  | 0.838 | 1.014 |

| Column             | Skewness | Kurtos. | K-S Dist. | K-S Prob. | SWilk | WSWilk |
|--------------------|----------|---------|-----------|-----------|-------|--------|
| tr nrg1-4 mOrange2 | -0.766   | 0.187   | 0.178     | 0.220     | 0.920 | 0.194  |
| tr nrg1-4 XopQ     | -0.145   | -0.889  | 0.144     | 0.504     | 0.959 | 0.683  |
| tr nrg1-5 mOrange2 | -0.220   | -1.132  | 0.153     | 0.421     | 0.942 | 0.403  |
| tr nrg1-5 XopQ     | 0.947    | -0.227  | 0.199     | 0.108     | 0.875 | 0.040  |
| tr WT mOrange2     | 0.408    | -0.733  | 0.145     | 0.495     | 0.963 | 0.738  |
| tr WT XopQ         | -0.381   | -0.649  | 0.192     | 0.141     | 0.955 | 0.602  |

| Column             | Sum    | Sum of Squares |
|--------------------|--------|----------------|
| tr nrg1-4 mOrange2 | 7.473  | 3.787          |
| tr nrg1-4 XopQ     | 10.834 | 7.850          |
| tr nrg1-5 mOrange2 | 7.792  | 4.142          |
| tr nrg1-5 XopQ     | 11.336 | 8.666          |
| tr WT mOrange2     | 8.384  | 4.839          |
| tr WT XopQ         | 13.866 | 13.008         |

One Way Analysis of Variance

Normality Test (Shapiro-Wilk) Passed (P = 0.977)  
 Equal Variance Test: Passed (P = 0.050)

| Group Name         | N  | Missing | Mean  | Std Dev | SEM    |
|--------------------|----|---------|-------|---------|--------|
| tr nrg1-4 mOrange2 | 15 | 0       | 0.498 | 0.0672  | 0.0174 |
| tr nrg1-4 XopQ     | 15 | 0       | 0.722 | 0.0420  | 0.0108 |
| tr nrg1-5 mOrange2 | 15 | 0       | 0.519 | 0.0825  | 0.0213 |
| tr nrg1-5 XopQ     | 15 | 0       | 0.756 | 0.0841  | 0.0217 |
| tr WT mOrange2     | 15 | 0       | 0.559 | 0.105   | 0.0270 |
| tr WT XopQ         | 15 | 0       | 0.924 | 0.117   | 0.0302 |

| Source of Variation | DF | SS    | MS      | F      | P      |
|---------------------|----|-------|---------|--------|--------|
| Between Groups      | 5  | 2.085 | 0.417   | 55.863 | <0.001 |
| Residual            | 84 | 0.627 | 0.00747 |        |        |
| Total               | 89 | 2.712 |         |        |        |

The differences in the mean values among the treatment groups are greater than would be expected by chance; there is a statistically significant difference (P = <0.001). Power of performed test with alpha = 0.050: 1.000

**All Pairwise Multiple Comparison Procedures (Tukey Test):**  
 Comparisons for factor:

| Comparison                    | Diff of Means | p | q | P      | P<0.050           |
|-------------------------------|---------------|---|---|--------|-------------------|
| tr WT XopQ vs. tr nrg1-4 mO   | 0.426         | 6 | 6 | 19.101 | <0.001 Yes        |
| tr WT XopQ vs. tr nrg1-5 mO   | 0.405         | 6 | 6 | 18.151 | <0.001 Yes        |
| tr WT XopQ vs. tr WT mOrange2 | 0.365         | 6 | 6 | 16.381 | <0.001 Yes        |
| tr WT XopQ vs. tr nrg1-4 XopQ | 0.202         | 6 | 6 | 9.058  | <0.001 Yes        |
| tr WT XopQ vs. tr nrg1-5 XopQ | 0.169         | 6 | 6 | 7.560  | <0.001 Yes        |
| tr nrg1-5 Xo vs. tr nrg1-4 mO | 0.257         | 6 | 6 | 11.542 | <0.001 Yes        |
| tr nrg1-5 Xo vs. tr nrg1-5 mO | 0.236         | 6 | 6 | 10.591 | <0.001 Yes        |
| tr nrg1-5 Xo vs. tr WT mOrang | 0.197         | 6 | 6 | 8.821  | <0.001 Yes        |
| tr nrg1-5 Xo vs. tr nrg1-4 Xo | 0.0334        | 6 | 6 | 1.498  | 0.896 No          |
| tr nrg1-4 Xo vs. tr nrg1-4 mO | 0.224         | 6 | 6 | 10.043 | <0.001 Yes        |
| tr nrg1-4 Xo vs. tr nrg1-5 mO | 0.203         | 6 | 6 | 9.093  | <0.001 Yes        |
| tr nrg1-4 Xo vs. tr WT mOrang | 0.163         | 6 | 6 | 7.323  | <0.001 Yes        |
| tr WT mOrang vs. tr nrg1-4 mO | 0.0607        | 6 | 6 | 2.721  | 0.395 No          |
| tr WT mOrang vs. tr nrg1-5 mO | 0.0395        | 6 | 6 | 1.770  | 0.810 Do Not Test |
| tr nrg1-5 mO vs. tr nrg1-4 mO | 0.0212        | 6 | 6 | 0.950  | 0.985 Do Not Test |

A result of "Do Not Test" occurs for a comparison when no significant difference is found between two means that enclose that comparison. For example, if you had four means sorted in order, and found no difference between means 4 vs. 2, then you would not test 4 vs. 3 and 3 vs. 2, but still test 4 vs. 1 and 3 vs. 1 (4 vs. 3 and 3 vs. 2 are enclosed by 4 vs. 2: 4 3 2 1). Note that not testing the enclosed means is a procedural rule, and a result of Do Not Test should be treated as if there is no significant difference between the means, even though one may appear to exist.

**Supplemental Statistics S5 - SF** was treated as a measurement variable. The different treatments were treated as nominal variable. Because SF is a proportion the values were arcsine transformed before further testing.

#### Descriptive Statistics

| Column               | Size | Missing | Mean  | Std Dev | Std. Error | C.I. of Mean  |
|----------------------|------|---------|-------|---------|------------|---------------|
| tr WT_mOrange        | 9    | 0       | 0.607 | 0.607   | 0.0807     | 0.0269 0.0620 |
| tr Adrl/Nrg1_mOrange | 15   | 0       | 0.556 | 0.556   | 0.0885     | 0.0228 0.0490 |
| tr WT_XopQ           | 9    | 0       | 0.835 | 0.835   | 0.116      | 0.0388 0.0894 |
| tr Adrl/Nrg1_XopQ    | 15   | 0       | 0.567 | 0.567   | 0.0798     | 0.0206 0.0442 |

| Column               | Range | Max   | Min   | Median | 25%   | 75%   |
|----------------------|-------|-------|-------|--------|-------|-------|
| tr WT_mOrange        | 0.240 | 0.757 | 0.517 | 0.560  | 0.548 | 0.670 |
| tr Adrl/Nrg1_mOrange | 0.289 | 0.747 | 0.458 | 0.539  | 0.489 | 0.580 |
| tr WT_XopQ           | 0.365 | 0.989 | 0.624 | 0.854  | 0.752 | 0.920 |
| tr Adrl/Nrg1_XopQ    | 0.245 | 0.703 | 0.458 | 0.549  | 0.513 | 0.632 |

| Column               | Skewness | Kurtosis | K-S Dist. | K-S Prob. | Swilk | WSwilk | Prob |
|----------------------|----------|----------|-----------|-----------|-------|--------|------|
| tr WT_mOrange        | 0.823    | -0.394   | 0.275     | 0.048     | 0.893 | 0.212  |      |
| tr Adrl/Nrg1_mOrange | 1.127    | 0.432    | 0.193     | 0.138     | 0.872 | 0.036  |      |
| tr WT_XopQ           | -0.773   | 0.105    | 0.225     | 0.207     | 0.935 | 0.527  |      |
| tr Adrl/Nrg1_XopQ    | 0.360    | -0.908   | 0.119     | 0.723     | 0.944 | 0.436  |      |

| Column               | Sum   | Sum of Squares |
|----------------------|-------|----------------|
| tr WT_mOrange        | 5.465 | 3.370          |
| tr Adrl/Nrg1_mOrange | 8.346 | 4.753          |
| tr WT_XopQ           | 7.513 | 6.380          |
| tr Adrl/Nrg1_XopQ    | 8.500 | 4.906          |

#### One Way Analysis of Variance

Normality Test (Shapiro-Wilk) Passed (P = 0.485)  
 Equal Variance Test: Passed (P = 0.795)

| Group Name           | N  | Missing | Mean  | Std Dev | SEM    |
|----------------------|----|---------|-------|---------|--------|
| tr WT_mOrange        | 9  | 0       | 0.607 | 0.607   | 0.0269 |
| tr Adrl/Nrg1_mOrange | 15 | 0       | 0.556 | 0.556   | 0.0228 |
| tr WT_XopQ           | 9  | 0       | 0.835 | 0.835   | 0.0388 |
| tr Adrl/Nrg1_XopQ    | 15 | 0       | 0.567 | 0.567   | 0.0206 |

| Source of Variation | DF | SS    | MS      | F      | P      |
|---------------------|----|-------|---------|--------|--------|
| Between Groups      | 3  | 0.520 | 0.173   | 21.242 | <0.001 |
| Residual            | 44 | 0.359 | 0.00816 |        |        |
| Total               | 47 | 0.879 |         |        |        |

The differences in the mean values among the treatment groups are greater than would be expected by chance; there is a statistically significant difference (P = <0.001).  
 Power of performed test with alpha = 0.050: 1.000

#### All Pairwise Multiple Comparison Procedures (Tukey Test):

Comparisons for factor:

| Comparison                     | Diff of Means | p | q      | P      | P<0.050     |
|--------------------------------|---------------|---|--------|--------|-------------|
| tr WT_XopQ vs. tr Adr1/Nrg1    | 0.278         | 4 | 10.338 | <0.001 | Yes         |
| tr WT_XopQ vs. tr Adr1/Nrg1    | 0.268         | 4 | 9.955  | <0.001 | Yes         |
| tr WT_XopQ vs. tr WT_mOrange   | 0.228         | 4 | 7.559  | <0.001 | Yes         |
| tr WT_mOrange vs. tr Adr1/Nrg1 | 0.0508        | 4 | 1.887  | 0.547  | No          |
| tr WT_mOrange vs. tr Adr1/Nrg1 | 0.0405        | 4 | 1.503  | 0.714  | Do Not Test |
| tr Adr1/Nrg1 vs. tr Adr1/Nrg1  | 0.0103        | 4 | 0.443  | 0.989  | Do Not Test |

A result of "Do Not Test" occurs for a comparison when no significant difference is found between two means that enclose that comparison. For example, if you had four means sorted in order, and found no difference between means 4 vs. 2, then you would not test 4 vs. 3 and 3 vs. 2, but still test 4 vs. 1 and 3 vs. 1 (4 vs. 3 and 3 vs. 2 are enclosed by 4 vs. 2: 4 3 2 1). Note that not testing the enclosed means is a procedural rule, and a result of Do Not Test should be treated as if there is no significant difference between the means, even though one may appear to exist.

## Supplemental Statistics S6 - PNAI was treated as a measurement variable. The different treatments were treated as nominal variable.

### Descriptive Statistics:

| Column             | Size | Missing | Mean  | Std Dev | Std. Error | C.I. of Mean |
|--------------------|------|---------|-------|---------|------------|--------------|
| WT XopQ all        | 297  | 0       | 6.084 | 2.318   | 0.135      | 0.265        |
| WT mOrange all     | 464  | 0       | 4.360 | 2.239   | 0.104      | 0.204        |
| adr1nrg1 XopQ      | 102  | 0       | 8.696 | 3.598   | 0.356      | 0.707        |
| adr1 nrg1 mOrange2 | 249  | 0       | 4.723 | 2.804   | 0.178      | 0.350        |
| nrg1-4 XopQ        | 113  | 0       | 5.867 | 1.868   | 0.176      | 0.348        |
| nrg1-4 mOrange2    | 126  | 0       | 3.897 | 1.710   | 0.152      | 0.302        |
| eds1 XopQ          | 66   | 0       | 8.076 | 2.276   | 0.280      | 0.559        |
| eds1 mOrange       | 90   | 0       | 5.633 | 1.917   | 0.202      | 0.401        |
| Roq-1-3 XopQ       | 61   | 0       | 7.246 | 2.357   | 0.302      | 0.604        |
| Roq1-3 mOrange     | 95   | 0       | 5.063 | 2.004   | 0.206      | 0.408        |

| Column             | Range  | Max    | Min   | Median | 25%   | 75%    |
|--------------------|--------|--------|-------|--------|-------|--------|
| WT XopQ all        | 13.000 | 14.000 | 1.000 | 6.000  | 4.000 | 7.000  |
| WT mOrange all     | 13.000 | 13.000 | 0.000 | 4.000  | 3.000 | 6.000  |
| adr1nrg1 XopQ      | 27.000 | 27.000 | 0.000 | 8.000  | 6.000 | 10.250 |
| adr1 nrg1 mOrange2 | 15.000 | 15.000 | 0.000 | 5.000  | 3.000 | 6.000  |
| nrg1-4 XopQ        | 8.000  | 10.000 | 2.000 | 6.000  | 5.000 | 7.000  |
| nrg1-4 mOrange2    | 8.000  | 9.000  | 1.000 | 4.000  | 3.000 | 5.000  |
| eds1 XopQ          | 10.000 | 14.000 | 4.000 | 8.000  | 6.000 | 10.000 |
| eds1 mOrange       | 9.000  | 10.000 | 1.000 | 5.000  | 4.000 | 7.000  |
| Roq-1-3 XopQ       | 10.000 | 13.000 | 3.000 | 7.000  | 5.500 | 9.000  |
| Roq1-3 mOrange     | 10.000 | 10.000 | 0.000 | 5.000  | 4.000 | 6.000  |

| Column             | Skewness | Kurtosis | K-S Dist. | K-S Prob. | Swilk | WSWilP |
|--------------------|----------|----------|-----------|-----------|-------|--------|
| WT XopQ all        | 0.734    | 0.860    | 0.141     | <0.001    | 0.950 | <0.001 |
| WT mOrange all     | 0.503    | 0.335    | 0.135     | <0.001    | 0.967 | <0.001 |
| adr1nrg1 XopQ      | 1.473    | 5.671    | 0.136     | <0.001    | 0.904 | <0.001 |
| adr1 nrg1 mOrange2 | 0.440    | 0.602    | 0.0992    | <0.001    | 0.961 | <0.001 |
| nrg1-4 XopQ        | -0.105   | -0.504   | 0.117     | <0.001    | 0.967 | 0.007  |
| nrg1-4 mOrange2    | 0.251    | -0.214   | 0.143     | <0.001    | 0.956 | <0.001 |
| eds1 XopQ          | 0.243    | -0.527   | 0.121     | 0.017     | 0.967 | 0.075  |
| eds1 mOrange       | 0.0213   | -0.402   | 0.141     | <0.001    | 0.970 | 0.034  |
| Roq-1-3 XopQ       | 0.382    | -0.268   | 0.132     | 0.010     | 0.966 | 0.088  |
| Roq1-3 mOrange     | 0.0249   | 0.00775  | 0.123     | 0.001     | 0.973 | 0.050  |

| Column             | Sum      | Sum of Squares |
|--------------------|----------|----------------|
| WT XopQ all        | 1807.000 | 12585.000      |
| WT mOrange all     | 2023.000 | 11141.000      |
| adr1nrg1 XopQ      | 887.000  | 9021.000       |
| adr1 nrg1 mOrange2 | 1176.000 | 7504.000       |
| nrg1-4 XopQ        | 663.000  | 4281.000       |
| nrg1-4 mOrange2    | 491.000  | 2279.000       |
| eds1 XopQ          | 533.000  | 4641.000       |
| eds1 mOrange       | 507.000  | 3183.000       |
| Roq-1-3 XopQ       | 442.000  | 3536.000       |
| Roq1-3 mOrange     | 481.000  | 2813.000       |

### One Way Analysis of Variance

Normality Test (Shapiro-Wilk) Failed (P < 0.050)  
 Test execution ended by user request, ANOVA on Ranks begun



Kruskal-Wallis One Way Analysis of Variance on Ranks

| Group              | N   | Missing | Median | 25%   | 75%    |
|--------------------|-----|---------|--------|-------|--------|
| Roq1-3 mOrange     | 95  | 0       | 5.000  | 4.000 | 6.000  |
| Roq1-3 XopQ        | 61  | 0       | 7.000  | 5.500 | 9.000  |
| eds1 mOrange       | 90  | 0       | 5.000  | 4.000 | 7.000  |
| eds1 XopQ          | 66  | 0       | 8.000  | 6.000 | 10.000 |
| nrg1-4 mOrange2    | 126 | 0       | 4.000  | 3.000 | 5.000  |
| nrg1-4 XopQ        | 113 | 0       | 6.000  | 5.000 | 7.000  |
| adr1 nrg1 mOrange2 | 249 | 0       | 5.000  | 3.000 | 6.000  |
| adr1nrg1 XopQ      | 102 | 0       | 8.000  | 6.000 | 10.250 |
| WT mOrange all     | 464 | 0       | 4.000  | 3.000 | 6.000  |
| WT XopQ all        | 297 | 0       | 6.000  | 4.000 | 7.000  |

H = 369.128 with 9 degrees of freedom. (P = <0.001)

The differences in the median values among the treatment groups are greater than would be expected by chance; there is a statistically significant difference (P = <0.001)

To isolate the group or groups that differ from the others use a multiple comparison procedure.

All Pairwise Multiple Comparison Procedures (Dunn's Method) :

| Comparison                     | Diff of Ranks | Q      | P<0.05      |
|--------------------------------|---------------|--------|-------------|
| adr1nrg1 XopQ vs nrg1-4 mOrang | 765.133       | 11.963 | Yes         |
| adr1nrg1 XopQ vs WT mOrange al | 668.019       | 12.721 | Yes         |
| adr1nrg1 XopQ vs adr1 nrg1 mOr | 587.146       | 10.401 | Yes         |
| adr1nrg1 XopQ vs Roq1-3 mOrang | 515.110       | 7.523  | Yes         |
| adr1nrg1 XopQ vs eds1 mOrange  | 399.535       | 5.753  | Yes         |
| adr1nrg1 XopQ vs nrg1-4 XopQ   | 347.932       | 5.305  | Yes         |
| adr1nrg1 XopQ vs WT XopQ all   | 339.626       | 6.163  | Yes         |
| adr1nrg1 XopQ vs Roq1-3 XopQ   | 132.459       | 1.704  | No          |
| adr1nrg1 XopQ vs eds1 XopQ     | 2.490         | 0.0328 | Do Not Test |
| eds1 XopQ vs nrg1-4 mOrange2   | 762.643       | 10.452 | Yes         |
| eds1 XopQ vs WT mOrange all    | 665.528       | 10.535 | Yes         |
| eds1 XopQ vs adr1 nrg1 mOr     | 584.656       | 8.794  | Yes         |
| eds1 XopQ vs Roq1-3 mOrange    | 512.620       | 6.662  | Yes         |
| eds1 XopQ vs eds1 mOrange      | 397.044       | 5.102  | Yes         |
| eds1 XopQ vs nrg1-4 XopQ       | 345.442       | 4.643  | Yes         |
| eds1 XopQ vs WT XopQ all       | 337.136       | 5.159  | Yes         |
| eds1 XopQ vs Roq1-3 XopQ       | 129.969       | 1.524  | Do Not Test |
| Roq1-3 XopQ vs nrg1-4 mOrang   | 632.674       | 8.447  | Yes         |
| Roq1-3 XopQ vs WT mOrange all  | 535.560       | 8.189  | Yes         |
| Roq1-3 XopQ vs adr1 nrg1 mOr   | 454.687       | 6.628  | Yes         |
| Roq1-3 XopQ vs Roq1-3 mOrange  | 382.652       | 4.857  | Yes         |
| Roq1-3 XopQ vs eds1 mOrange    | 267.076       | 3.354  | Yes         |
| Roq1-3 XopQ vs nrg1-4 XopQ     | 215.473       | 2.824  | No          |
| Roq1-3 XopQ vs WT XopQ all     | 207.167       | 3.069  | Do Not Test |
| WT XopQ all vs nrg1-4 mOrange2 | 425.507       | 8.334  | Yes         |
| WT XopQ all vs WT mOrange all  | 328.393       | 9.203  | Yes         |
| WT XopQ all vs adr1 nrg1 mOr   | 247.520       | 5.999  | Yes         |
| WT XopQ all vs Roq1-3 mOrange  | 175.485       | 3.100  | No          |
| WT XopQ all vs eds1 mOrange    | 59.909        | 1.037  | Do Not Test |
| WT XopQ all vs nrg1-4 XopQ     | 8.306         | 0.156  | Do Not Test |
| nrg1-4 XopQ vs nrg1-4 mOrange2 | 417.201       | 6.706  | Yes         |
| nrg1-4 XopQ vs WT mOrange all  | 320.087       | 6.354  | Yes         |
| nrg1-4 XopQ vs adr1 nrg1 mOr   | 239.214       | 4.392  | Yes         |
| nrg1-4 XopQ vs Roq1-3 mOrange  | 167.178       | 2.501  | Do Not Test |
| nrg1-4 XopQ vs eds1 mOrange    | 51.603        | 0.761  | Do Not Test |
| eds1 mOrange vs nrg1-4 mOrang  | 365.598       | 5.516  | Yes         |
| eds1 mOrange vs WT mOrange all | 268.484       | 4.854  | Yes         |
| eds1 mOrange vs adr1 nrg1 mOr  | 187.611       | 3.176  | No          |
| eds1 mOrange vs Roq1-3 mOrange | 115.576       | 1.636  | Do Not Test |
| Roq1-3 mOrang vs nrg1-4 mOrang | 250.023       | 3.832  | Yes         |
| Roq1-3 mOrang vs WT mOrange al | 152.908       | 2.828  | No          |
| Roq1-3 mOrang vs adr1 nrg1 mOr | 72.035        | 1.244  | Do Not Test |
| adr1 nrg1 mOr vs nrg1-4 mOrang | 177.987       | 3.390  | Yes         |
| adr1 nrg1 mOr vs WT mOrange al | 80.873        | 2.144  | Do Not Test |
| WT mOrange al vs nrg1-4 mOrang | 97.114        | 2.013  | No          |

Note: The multiple comparisons on ranks do not include an adjustment for ties.

**Supplemental Statistics S7** - SF was treated as a measurement variable. The different treatments were treated as nominal variable. Because SF is a proportion the values were arcsine transformed before further testing.

**Descriptive Statistics:**

| Column  | Size | Missing | Mean  | Std Dev | Std. Error | C.I. of Mean |
|---------|------|---------|-------|---------|------------|--------------|
| ni      | 16   | 0       | 0.141 | 0.0381  | 0.00953    | 0.0203       |
| AIM     | 22   | 0       | 0.240 | 0.0920  | 0.0196     | 0.0408       |
| mOrange | 23   | 0       | 0.460 | 0.131   | 0.0272     | 0.0565       |

| Column  | Range | Max   | Min    | Median | 25%   | 75%   |
|---------|-------|-------|--------|--------|-------|-------|
| ni      | 0.157 | 0.248 | 0.0907 | 0.132  | 0.119 | 0.156 |
| AIM     | 0.321 | 0.421 | 0.0997 | 0.233  | 0.170 | 0.298 |
| mOrange | 0.476 | 0.665 | 0.188  | 0.484  | 0.379 | 0.579 |

| Column  | Skewness | Kurtosis | K-S Dist. | K-S Prob. | SWilk | WSWilk | Prob |
|---------|----------|----------|-----------|-----------|-------|--------|------|
| ni      | 1.500    | 3.256    | 0.197     | 0.098     | 0.878 | 0.036  |      |
| AIM     | 0.537    | -0.392   | 0.137     | 0.328     | 0.948 | 0.290  |      |
| mOrange | -0.358   | -0.475   | 0.0940    | 0.769     | 0.967 | 0.625  |      |

**One Way Analysis of Variance**

Normality Test (Shapiro-Wilk) Passed (P = 0.271)  
 Equal Variance Test: Failed (P < 0.050)

| Group Name | N  | Missing | Mean  | Std Dev | SEM     |
|------------|----|---------|-------|---------|---------|
| ni         | 16 | 0       | 0.141 | 0.0381  | 0.00953 |
| AIM        | 22 | 0       | 0.240 | 0.0920  | 0.0196  |
| mOrange    | 23 | 0       | 0.460 | 0.131   | 0.0272  |

| Source of Variation | DF | SS    | MS      | F      | P      |
|---------------------|----|-------|---------|--------|--------|
| Between Groups      | 2  | 1.077 | 0.538   | 54.298 | <0.001 |
| Residual            | 58 | 0.575 | 0.00992 |        |        |
| Total               | 60 | 1.652 |         |        |        |

The differences in the mean values among the treatment groups are greater than would be expected by chance; there is a statistically significant difference (P = <0.001).  
 Power of performed test with alpha = 0.050: 1.000  
 All Pairwise Multiple Comparison Procedures (Tukey Test):

Comparisons for factor:

| Comparison      | Diff of Means | p | q      | P      | P<0.050 |
|-----------------|---------------|---|--------|--------|---------|
| mOrange vs. ni  | 0.320         | 3 | 13.947 | <0.001 | Yes     |
| mOrange vs. AIM | 0.221         | 3 | 10.504 | <0.001 | Yes     |
| AIM vs. ni      | 0.0991        | 3 | 4.285  | 0.010  | Yes     |

**Supplemental Statistics S8** - SF was treated as a measurement variable. The different treatments were treated as nominal variable. Because SF is a proportion the values were arcsine transformed before further testing.

**Descriptive Statistics:**

| Column  | Size | Missing | Mean  | Std Dev | Std. Error | C.I. of Mean |
|---------|------|---------|-------|---------|------------|--------------|
| mO/tr   | 13   | 0       | 0.379 | 0.0854  | 0.0237     | 0.0516       |
| Xq/tr   | 13   | 0       | 0.849 | 0.0721  | 0.0200     | 0.0436       |
| NRG1/tr | 13   | 0       | 0.590 | 0.0602  | 0.0167     | 0.0364       |
| NRG1/tr | 13   | 0       | 0.521 | 0.0856  | 0.0237     | 0.0517       |
| NI/tr   | 13   | 0       | 0.152 | 0.0435  | 0.0121     | 0.0263       |

| Column      | Range | Max   | Min    | Median | 25%   | 75%   |
|-------------|-------|-------|--------|--------|-------|-------|
| mO/tr       | 0.323 | 0.542 | 0.219  | 0.386  | 0.325 | 0.432 |
| Xq/tr       | 0.241 | 0.950 | 0.709  | 0.849  | 0.807 | 0.909 |
| NRG1/tr     | 0.205 | 0.699 | 0.494  | 0.591  | 0.536 | 0.638 |
| NRG1 tag tr | 0.280 | 0.644 | 0.364  | 0.537  | 0.449 | 0.583 |
| NI/tr       | 0.160 | 0.250 | 0.0894 | 0.145  | 0.123 | 0.179 |

| Column      | Skewness | Kurtosis | K-S Dist. | K-S Prob. | SWilk | WSWilk | Prob |
|-------------|----------|----------|-----------|-----------|-------|--------|------|
| mO/tr       | -0.0950  | 0.313    | 0.114     | 0.792     | 0.983 | 0.991  |      |
| Xq/tr       | -0.388   | -0.210   | 0.161     | 0.439     | 0.957 | 0.709  |      |
| NRG1/tr     | 0.103    | -0.538   | 0.102     | 0.833     | 0.977 | 0.960  |      |
| NRG1 tag/tr | -0.399   | -0.603   | 0.134     | 0.662     | 0.965 | 0.828  |      |
| NI/tr       | 0.772    | 0.948    | 0.143     | 0.595     | 0.950 | 0.595  |      |

| Column      | Sum    | Sum of Squares |
|-------------|--------|----------------|
| mO/tr       | 4.922  | 1.951          |
| Xq/tr       | 11.039 | 9.436          |
| NRG1/tr     | 7.665  | 4.563          |
| NRG1 tag/tr | 6.774  | 3.618          |
| NI/tr       | 1.970  | 0.321          |

### One Way Analysis of Variance

Normality Test (Shapiro-Wilk) Passed (P = 0.803)

Equal Variance Test: Passed (P = 0.194)

| Group Name | N  | Missing | Mean  | Std Dev | SEM    |
|------------|----|---------|-------|---------|--------|
| mO/tr      | 13 | 0       | 0.379 | 0.0854  | 0.0237 |
| Xq/tr      | 13 | 0       | 0.849 | 0.0721  | 0.0200 |
| NRG1/tr    | 13 | 0       | 0.590 | 0.0602  | 0.0167 |
| /tr        | 13 | 0       | 0.521 | 0.0856  | 0.0237 |
| NI/tr      | 13 | 0       | 0.152 | 0.0435  | 0.0121 |

| Source of Variation | DF | SS    | MS      | F       | P      |
|---------------------|----|-------|---------|---------|--------|
| Between Groups      | 4  | 3.465 | 0.866   | 170.929 | <0.001 |
| Residual            | 60 | 0.304 | 0.00507 |         |        |
| Total               | 64 | 3.769 |         |         |        |

The differences in the mean values among the treatment groups are greater than would be expected by chance; there is a statistically significant difference (P = <0.001).

Power of performed test with alpha = 0.050: 1.000

### All Pairwise Multiple Comparison Procedures (Tukey Test):

| Comparison            | Diff of Means | p | q      | P      | P<0.050 |
|-----------------------|---------------|---|--------|--------|---------|
| Xq/tr vs. NI/tr       | 0.698         | 5 | 35.333 | <0.001 | Yes     |
| Xq/tr vs. mO/tr       | 0.471         | 5 | 23.833 | <0.001 | Yes     |
| Xq/tr vs. /tr         | 0.328         | 5 | 16.616 | <0.001 | Yes     |
| Xq/tr vs. NRG1/tr     | 0.260         | 5 | 13.144 | <0.001 | Yes     |
| NRG1/tr vs. NI/tr     | 0.438         | 5 | 22.189 | <0.001 | Yes     |
| NRG1/tr vs. mO/tr     | 0.211         | 5 | 10.689 | <0.001 | Yes     |
| NRG1/tr vs. /tr       | 0.0685        | 5 | 3.472  | 0.115  | No      |
| NRG1 tag/tr vs. NI/tr | 0.370         | 5 | 18.717 | <0.001 | Yes     |
| NRG1 tag/tr vs. mO/tr | 0.142         | 5 | 7.217  | <0.001 | Yes     |
| mO/tr vs. NI/tr       | 0.227         | 5 | 11.500 | <0.001 | Yes     |

**Supplemental Statistics S9 - PNAI was treated as a measurement variable. The different treatments were treated as nominal variable.**

### Descriptive Statistics:

| Column       | Size | Missing | Mean  | Std Dev | Std. Error | C.I. of Mean |
|--------------|------|---------|-------|---------|------------|--------------|
| mOrange2     | 85   | 0       | 5.624 | 2.521   | 0.273      | 0.544        |
| XopQmOrange2 | 83   | 0       | 6.614 | 2.241   | 0.246      | 0.489        |
| NRG1         | 60   | 0       | 5.183 | 2.095   | 0.270      | 0.541        |
| NRG1/tag     | 64   | 0       | 5.656 | 2.885   | 0.361      | 0.721        |
| NI           | 76   | 0       | 2.408 | 1.338   | 0.154      | 0.306        |

| Column       | Range  | Max    | Min   | Median | 25%   | 75%   |
|--------------|--------|--------|-------|--------|-------|-------|
| mOrange2     | 12.000 | 12.000 | 0.000 | 5.000  | 4.000 | 7.000 |
| XopQmOrange2 | 12.000 | 14.000 | 2.000 | 6.000  | 5.000 | 8.000 |
| NRG1         | 10.000 | 10.000 | 0.000 | 5.000  | 4.000 | 6.000 |
| NRG1/tag     | 17.000 | 17.000 | 0.000 | 5.500  | 4.000 | 7.000 |
| NI           | 6.000  | 6.000  | 0.000 | 2.000  | 1.250 | 3.000 |

| Column       | Skewness | Kurtosis | K-S Dist. | K-S Prob. | SWilk | WSWilk | Prob |
|--------------|----------|----------|-----------|-----------|-------|--------|------|
| mOrange2     | 0.529    | 0.310    | 0.158     | <0.001    | 0.957 | 0.006  |      |
| XopQmOrange2 | 0.725    | 0.676    | 0.130     | 0.001     | 0.949 | 0.002  |      |
| NRG1         | 0.000361 | 0.246    | 0.165     | <0.001    | 0.964 | 0.075  |      |
| NRG1/tag     | 1.395    | 3.932    | 0.155     | <0.001    | 0.891 | <0.001 |      |
| NI           | 0.545    | -0.265   | 0.251     | <0.001    | 0.914 | <0.001 |      |

| Column       | Sum     | Sum of Squares |
|--------------|---------|----------------|
| mOrange2     | 478.000 | 3222.000       |
| XopQmOrange2 | 549.000 | 4043.000       |
| NRG1         | 311.000 | 1871.000       |
| NRG1/tag     | 362.000 | 2572.000       |

NI 183.000 575.000

**One Way Analysis of Variance**

Normality Test (Shapiro-Wilk) Failed (P < 0.050)

Test execution ended by user request, ANOVA on Ranks begun

Kruskal-Wallis One Way Analysis of Variance on Ranks

| Group        | N  | Missing | Median | 25%   | 75%   |
|--------------|----|---------|--------|-------|-------|
| mOrange2     | 85 | 0       | 5.000  | 4.000 | 7.000 |
| XopQmOrange2 | 83 | 0       | 6.000  | 5.000 | 8.000 |
| NRG1         | 60 | 0       | 5.000  | 4.000 | 6.000 |
| NRG1/tag     | 64 | 0       | 5.500  | 4.000 | 7.000 |
| NI           | 76 | 0       | 2.000  | 1.250 | 3.000 |

H = 127.244 with 4 degrees of freedom. (P = <0.001)

The differences in the median values among the treatment groups are greater than would be expected by chance; there is a statistically significant difference (P = <0.001)

To isolate the group or groups that differ from the others use a multiple comparison procedure.

**All Pairwise Multiple Comparison Procedures (Dunn's Method):**

| Comparison               | Diff of Ranks | Q      | P<0.05      |
|--------------------------|---------------|--------|-------------|
| XopQmOrange2 vs NI       | 179.492       | 10.628 | Yes         |
| XopQmOrange2 vs NRG1     | 54.476        | 3.022  | Yes         |
| XopQmOrange2 vs NRG1/tag | 46.145        | 2.608  | No          |
| XopQmOrange2 vs mOrange2 | 42.536        | 2.591  | Do Not Test |
| mOrange2 vs NI           | 136.955       | 8.155  | Yes         |
| mOrange2 vs NRG1         | 11.940        | 0.666  | No          |
| mOrange2 vs NRG1/tag     | 3.608         | 0.205  | Do Not Test |
| NRG1/tag vs NI           | 133.347       | 7.389  | Yes         |
| NRG1/tag vs NRG1         | 8.331         | 0.436  | Do Not Test |
| NRG1 vs NI               | 125.016       | 6.805  | Yes         |

Note: The multiple comparisons on ranks do not include an adjustment for ties.

## **Supplemental – Materials and Methods**

## Supplemental Materials and Methods S1 Generation of *Nb nrg1 adr1* double mutant line.

(A) Scheme of pDGE365 used for generation of *Nb nrg1 adr1* double mutant plants; based on pDGE311 (Stuttman *et al.*, 2021). Guide RNAs were expressed under control of an *Arabidopsis* U6 promotor fragment. Target sites are depicted, color code corresponds to panel b. (B) Gene models of *nrg1* and *adr1* genes targeted for editing. *NRG1* contains +1 and -1 nt mutations in the line used in this study; the +1 mutation at target site 1 induces a STOP codon directly downstream. The +1 insertion at target site 4 in *adr1* (magenta) induces an early STOP 20 codons downstream, before target site 5 (grey).

**A**

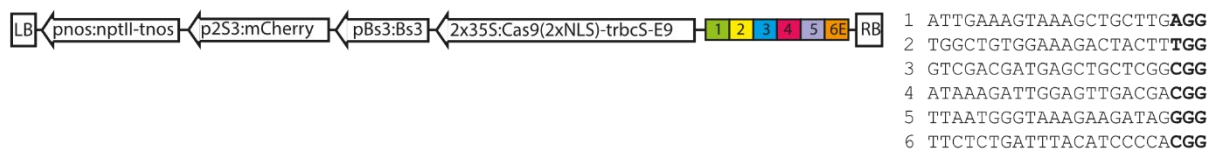

**B** Niben101Scf02118g00018 (*NbNRG1*)

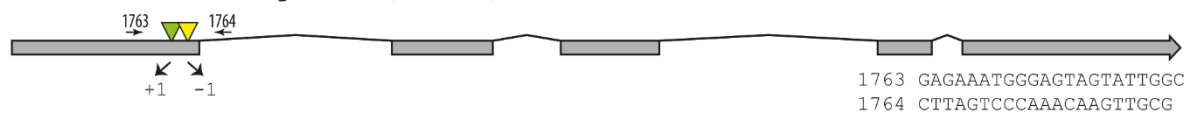

Niben101Scf02422g02015 (*NbADR1*)

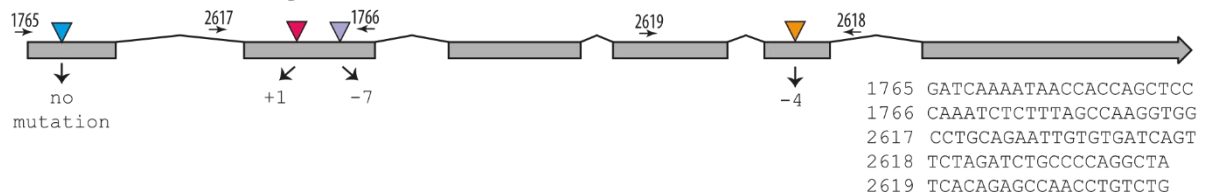

| <b>Primer</b>               | <b>Sequence, 5' -&gt;3'</b> | <b>Use</b>                                                                |
|-----------------------------|-----------------------------|---------------------------------------------------------------------------|
| <b>AC509</b>                | GGTTTCCGCAATGATCCCTC        | see AC509                                                                 |
| <b>AC510</b>                | AAGCTCCTTGATGCCTTCCT        | ZmCas9 intron; check for the transgene; with AC510; WT=523bp              |
| <b>JS1763_NRG1screen-F</b>  | GAGAAATGGGAGTAGTATTGGC      | JS1764                                                                    |
| <b>JS1764_NRG1screen-R</b>  | CTTAGTCCCAAACAAGTTGCG       | genotyping of nrg1 mutation; with JS1763; WT=360bp                        |
| <b>JS1765_ADR1screen1-F</b> | GATCAAAATAACCACCAGCTCC      | see JS1766                                                                |
| <b>JS1766_ADR1screen1-R</b> | CAAATCTCTTTAGCCAAGGTGG      | genotyping of adr1 mutation over sgRNA1, 2 and 3; with JS1765; WT=1089 bp |
| <b>AC455</b>                | CCTGCAGAATTGTGTGATCAGT      | genotyping of adr1 mutation over sgRNA1; with JS1766; WT=481bp            |
| <b>AC456</b>                | TCTAGATCTGCCCCAGGCTA        | see AC457                                                                 |
| <b>AC457</b>                | TCACAGAGCCAACCTGTCTG        | genotyping of adr1 mutation over sgRNA2; with AC456; WT=644bp             |
| <b>AC511</b>                | TCCACTCTGTTTAAGCAGCA        | additional sequencing of the ADR1 locus                                   |
| <b>AC512</b>                | CACCCAAGTCGAGGAAACAC        | additional sequencing of the ADR1 locus                                   |

## Supplemental Materials and Methods S2 Cloning of plasmids

The promotor and terminator module were available in the plasmid collection of Engler et al. (2014). The transit peptide of RUBISCO from *Nicotiana benthamiana* was created as a SP module and eGFP as a CDS2\* module (Engler *et al.*, 2014; Marillonnet & Werner, 2015). The following primers were used to clone the two modules: L0-SP-ssu-for = ttga aga caa aatg gct tcc tca gtt ctt tc; L0-SP-ssu-rev = ttg aag aca aac ctg agc tca aat cag gaa ggt atg; L0-CDS2\*-eGFP-for = ttg aag aca aag gtg tga gca agg gcg agg; L0-CDS2\*-eGFP-rev = ttg aag aca aaa gct tac ttg tac agc tcg tcc atg c. For the amplification of the transit peptide a plastid marker construct described in (Nelson *et al.*, 2007) was used as a template. eGFP was amplified from pICSL30006 (Engler *et al.*, 2014).

NRG1 overexpression constructs were assembled using the Modular Cloning (MoClo) system and modules from the Plant Parts I and II collections (Engler et al., 2014; Gantner et al., 2018). The *NbNRG1* coding sequence without STOP codon was cloned into pAGM1287; internal *BsaI* and/or *BpiI* restriction sites were eliminated (pJOG1210). The coding sequence with STOP codon was amplified from this construct and cloned into pICH41308 (pJOG1373). A 606 bp fragment upstream of *NbNRG1* was cloned as promoter fragment by PCR amplification and ligation into pICH41295 (pJOG1369). Constructs for expression NRG1 with or without a 6xHA-2xStrep tag (HS) were assembled as following:

| Expression cassette        | Acceptor         | Promotor  | CDS      | tag     | terminator |
|----------------------------|------------------|-----------|----------|---------|------------|
| <i>pMAS:NRG1:tOCS</i>      | pICH47732 L1-P1f | pICH85281 | pJOG1373 | None    | pICH41432  |
| <i>pMAS:NRG1:HS:tOCS</i>   | pICH47732 L1-P1f | pICH85281 | pJOG1210 | pJOG331 | pICH41432  |
| <i>pUBQ10:NRG1:tOCS</i>    | pICH47732 L1-P1f | pJOG684   | pJOG1373 | None    | pICH41432  |
| <i>pUBQ10:NRG1:HS:tOCS</i> | pICH47732 L1-P1f | pJOG684   | pJOG1210 | pJOG331 | pICH41432  |
| <i>pNRG1:NRG1:tOCS</i>     | pICH47732 L1-P1f | pJOG1369  | pJOG1373 | None    | pICH41432  |
| <i>pNRG1:NRG1:HS:tOCS</i>  | pICH47732 L1-P1f | pJOG1369  | pJOG1210 | pJOG331 | pICH41432  |



**Supplemental Materials and Methods S3 Experimental procedure utilized for *A. tumefaciens* infiltration experiments.**

Depiction of the experimental procedure for assessing stromule frequency in different mutant backgrounds. Bacteria mix = 1:1 mixes of *A. tumefaciens* of an  $OD_{600nm} = 0.2$ .

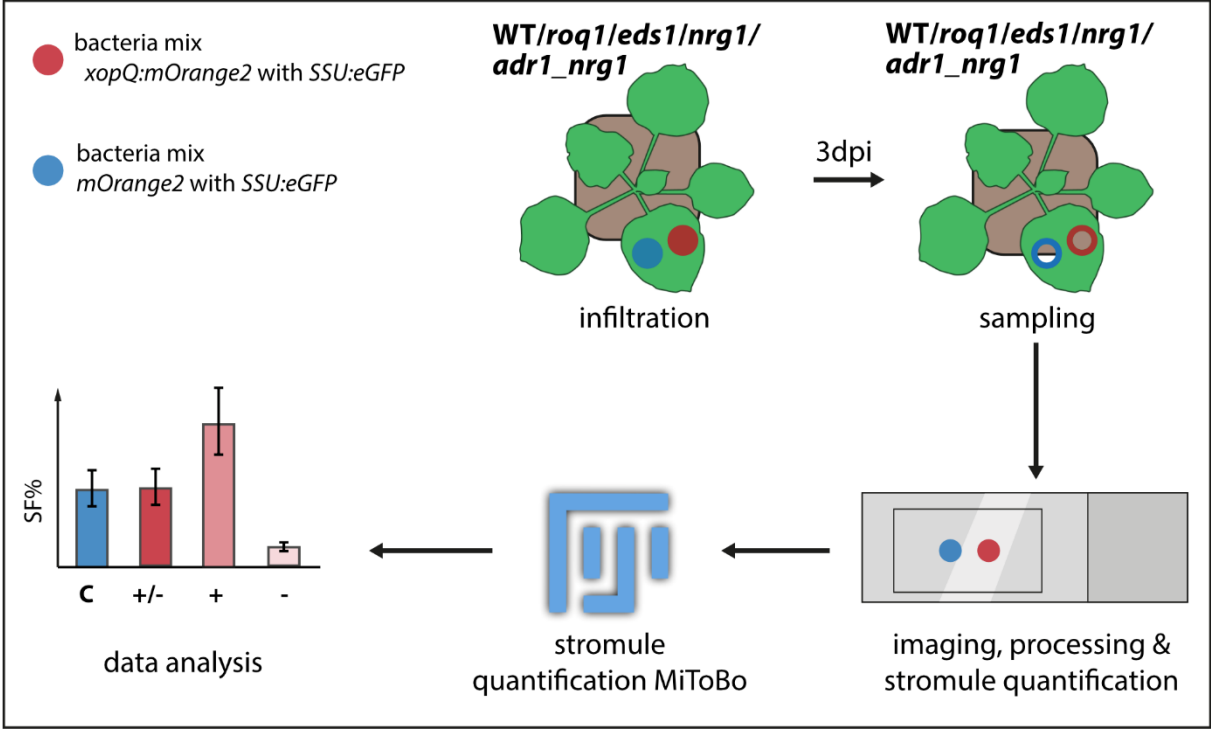

**Supplemental Materials and Methods S4 Information on sample sizes and data analysis for stromule frequencies and PNAI values.** Stromule frequency measurements in WT, *roq1*, *eds1*, *nrg1* and *adr1\_nrg1* mutant plant lines in response to *xopQ-mOrange2* and *mOrange2* expression were performed in 3 independently grown batches of 3-5 plants each. Stromule frequencies presented in Figure 2, 3, 4, 5 and Fig S9 represent the average values of all experiments. SF% in Figure 1 represents the average of 5 plants. For calculation of stromule frequencies in % (SF%) the number of plastids with one or more stromules was counted and divided by the total number of plastids. The resulting data was arcsine transformed, and statistical analysis was performed on the transformed data using SigmaPlot 12 (Systat Software GmbH, Erkrath, Germany). 95% confidence intervals and arithmetic averages were calculated and back-transformed data was represented in bar graphs (transformations completed using Microsoft Excel). For evaluating statistical significance between SF% values One-Way ANOVA and a subsequent Post Hoc Test (Tukey Test) were performed using SigmaPlot 12 (Systat Software GmbH, Erkrath, Germany). Test results can be found in supplemental materials “notes on stats”.

PNAI was measured with the help of the Fiji/ImageJ MTBCellcounterPlugIn (Franke *et al.*, 2015). For evaluating statistical significance between the PNAI of the various treatments a Kruskal Wallis One-Way ANOVA analysis on ranks and a Post Hoc test (Dunn’s Method) was performed using SigmaPlot 12 (Systat Software GmbH, Erkrath, Germany).

## Supplemental Materials and Methods S5 Naming conventions.

### Genes

Names for plant genes are given in italic capital letters (e.g. *ROQ1*). Names of mutant alleles are printed in small italic letters (e.g. *roq1-3*). Bacterial genes are printed in small italic letters, with the exception of the letter designation which is capitalized (e.g. *xopQ* = the gene *Xanthomonas outer protein Q*). Genes which are missing in a given bacterial strain are indicated by the Greek letter delta (e.g.  $\Delta xopQ$  = strain missing the *xopQ* gene). Cloned DNA sequences are handled like the respective genes. Fusion sites of DNA sequences are indicated by “:” (e.g. *FNR:eGFP; xopQ:mOrange2*).

### Proteins

Plant proteins are not italicized and in all capital letters (e.g. ROQ1). Bacterial proteins are not italicized and start with a capital letter (e.g. XopQ = the protein Xanthomonas outer protein Q). Fluorescence proteins and genes are treated as plant genes and proteins when the name is abbreviated, such as *eGFP* (gene) or eGFP (Protein). Such protein names often consist of information about the species, the name of a color, descriptive words or oligomerization or other properties (this is indicated in small letters). In cases where the full name of the fluorescence protein is used, rather than the abbreviation, the first letter is capitalized (e.g. *mOrange2* = monomeric (property of protein=small) Orange fluorescence protein (full fluorescence protein name) 2 (numerical designation)). The protein is addressed in all capital not italicized letters except for the oligomerization descriptor (e.g. mORANGE2). Fusion sites of protein sequences are indicated by “-” (e.g. XopQ-mORANGE2).

## Supplemental References

**Engler C, Youles M, Gruetzner R, Ehnert T-M, Werner S, Jones JDG, Patron NJ, Marillonnet S. 2014.** A golden gate modular cloning toolbox for plants. *ACS synthetic biology* **3**: 839–843.

**Franke L, Erickson JL, Rödel D, Schröter D, Storbeck B, Möller B, Schattat MH. 2015.** The ‘MTB Cell Counter’ a versatile tool for the semi-automated quantification of sub-cellular phenotypes in fluorescence microscopy images. A case study on plastids, nuclei and peroxisomes. **26**: 031–042.

**Gantner, J., Ordon, J., Ilse, T., Kretschmer, C., Gruetzner, R., Lofke, C., Dagdas, Y., Burstenbinder, K., Marillonnet, S., and Stuttmann, J. (2018).** Peripheral infrastructure vectors and an extended set of plant parts for the Modular Cloning system. *PLoS ONE* **13**, e0197185.

**Marillonnet S, Werner S. 2015.** Assembly of Multigene Constructs Using Golden Gate Cloning. *Methods Mol Biol* **1321**: 269–284.

**Nelson BK, Cai X, Nebenführ A. 2007.** A multicolored set of in vivo organelle markers for co-localization studies in Arabidopsis and other plants. *Plant Journal* **51**: 1126–1136.

**Stuttmann J, Barthel K, Martin P, Ordon J, Erickson JL, Herr R, Ferik F, Kretschmer C, Berner T, Keilwagen J, et al. 2021.** Highly efficient multiplex editing: one-shot generation of 8× *Nicotiana benthamiana* and 12× *Arabidopsis* mutants. *Plant J* **106**: 8–22.
